# Supplementary material for: Digging into the 3D Structure Predictions of AlphaFold2 with Low Confidence: Disorder and Beyond
Source: MDPI journal article supplement (doi:10.3390/biom12101467), 2022-10-13

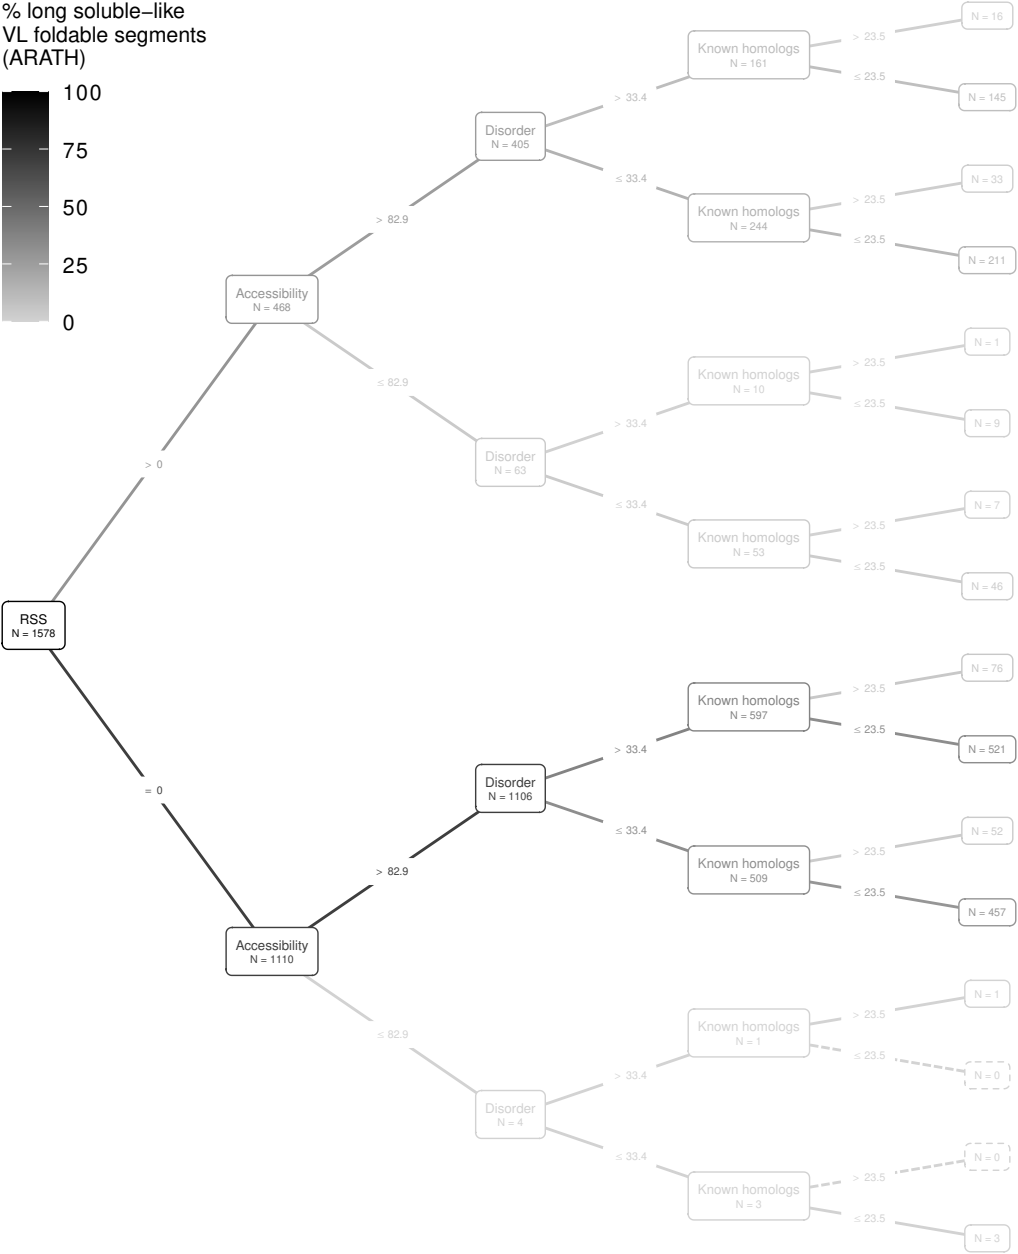

% long soluble-like  
VL foldable segments  
(CAEEL)

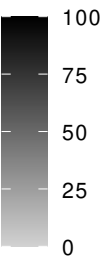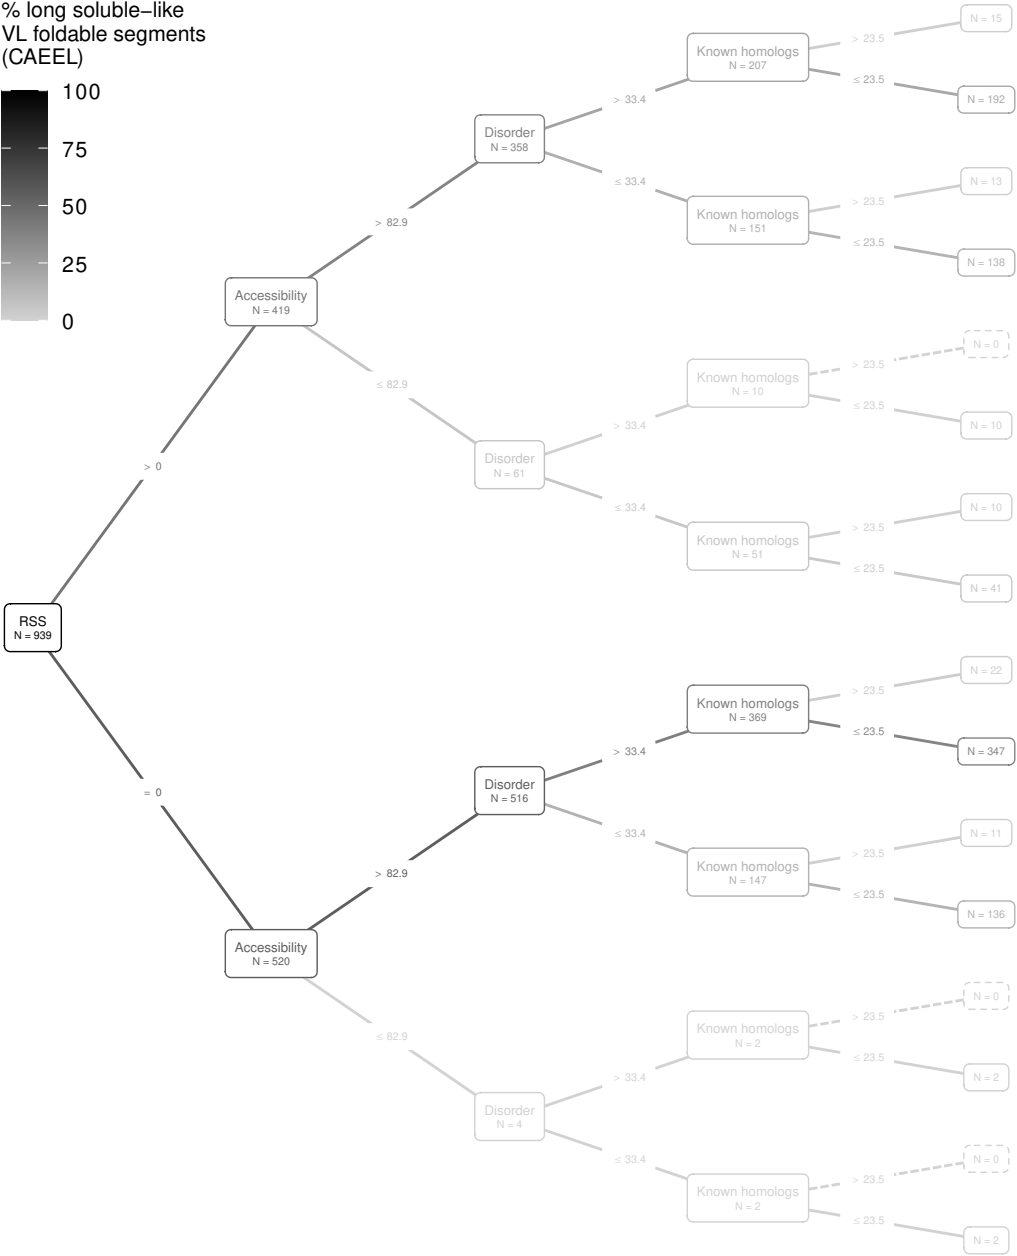

% long soluble-like  
VL foldable segments  
(CANAL)

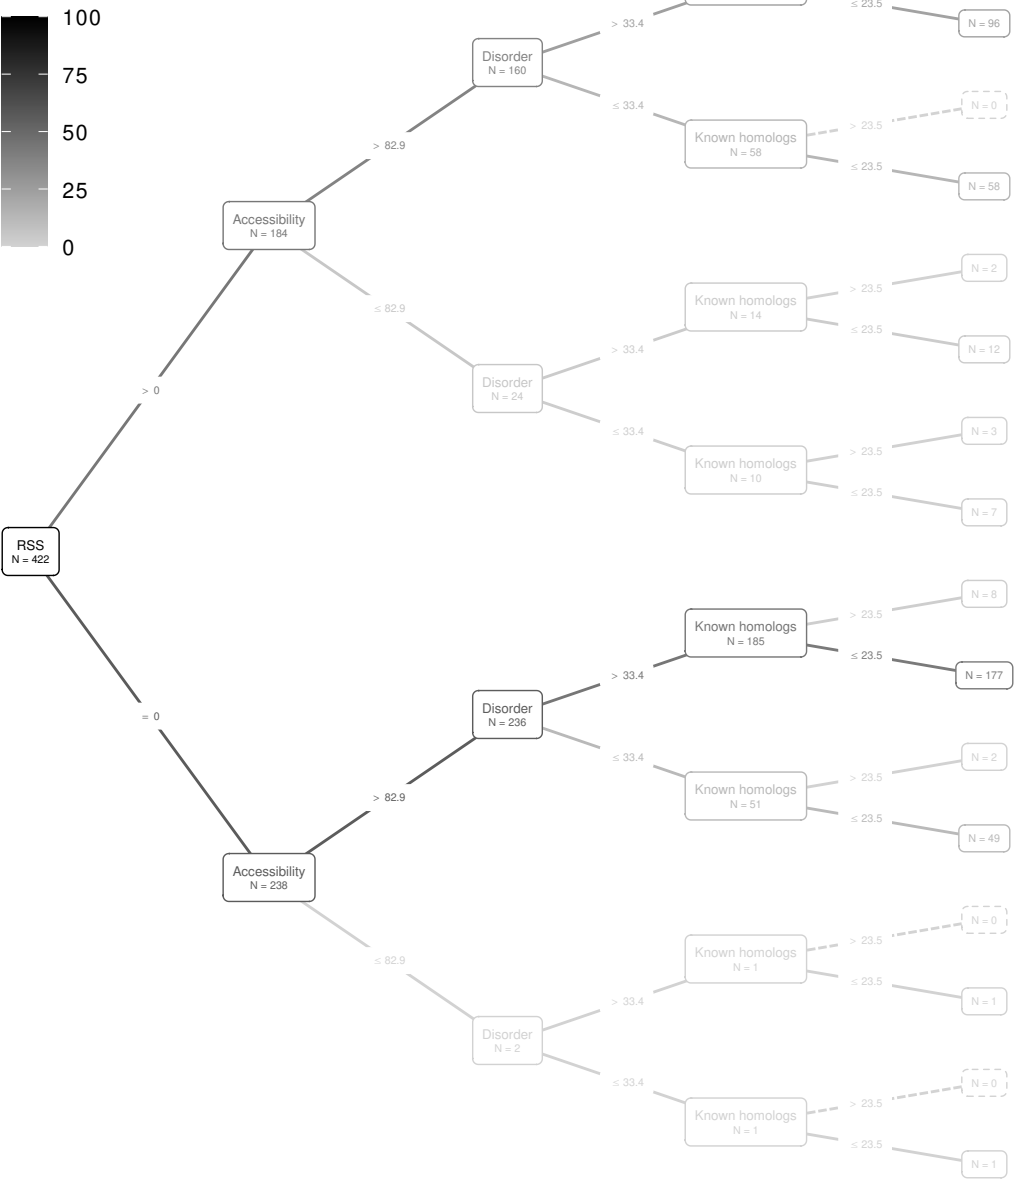

% long soluble-like  
VL foldable segments  
(DANRE)

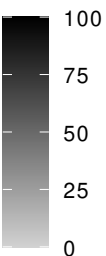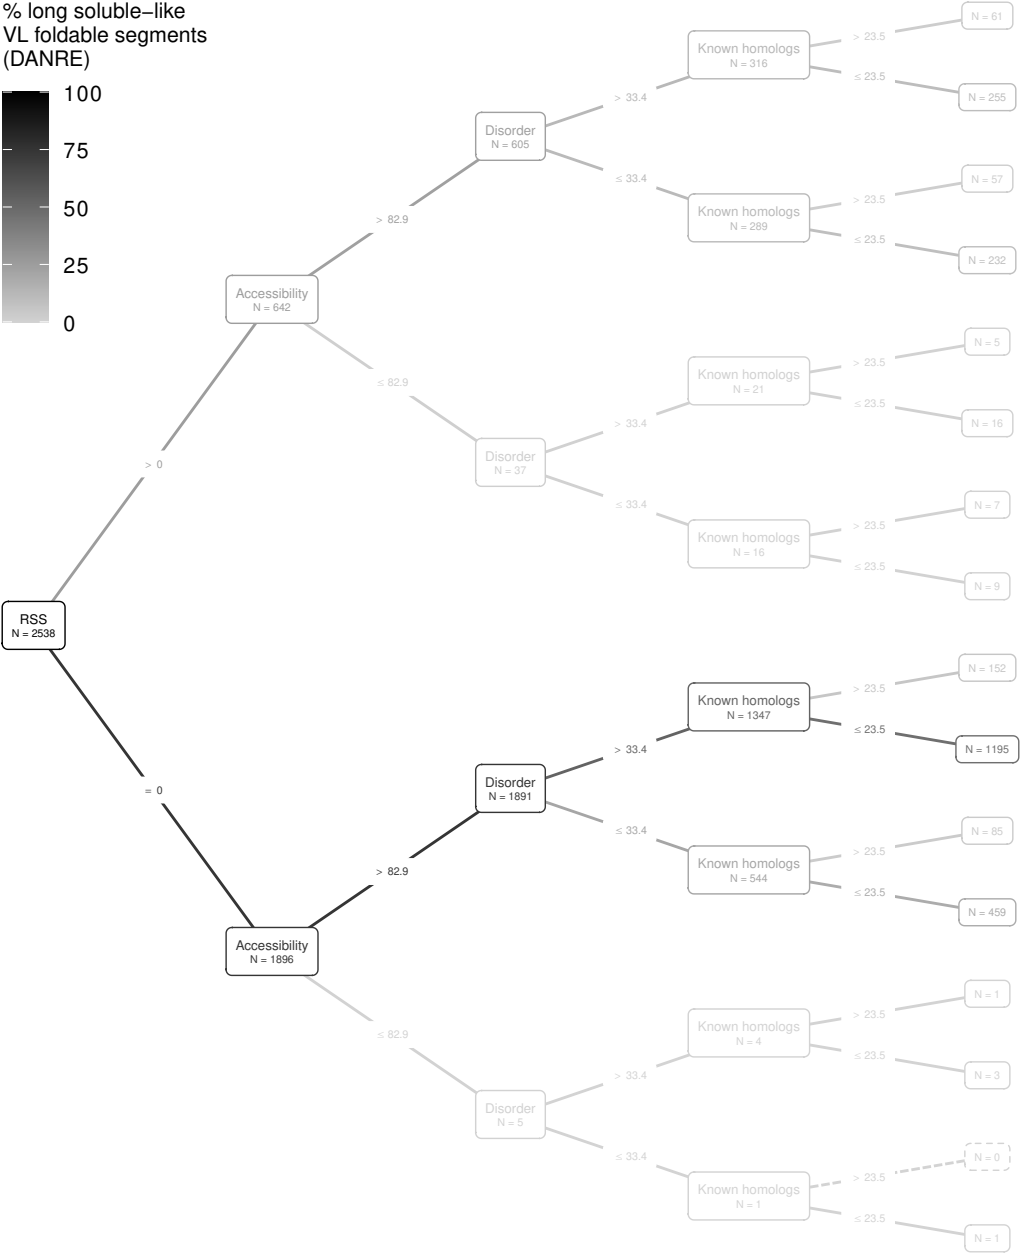

The diagram illustrates a hierarchical classification of 1385 RSS items. The root node is RSS (N = 1385), which splits into two main branches based on the Accessibility metric: > 0 (N = 606) and = 0 (N = 779). Each branch further splits into Disorder and Accessibility categories, leading to Known homologs and finally to specific counts (N). A color scale on the left indicates the proportion of items, ranging from 0 (black) to 100 (white).

**Branch 1: RSS (N = 1385) - Accessibility > 0 (N = 606)**

- Disorder (N = 516)
  - > 33.4: Known homologs (N = 263)
    - > 23.5: N = 231
    - ≤ 23.5: N = 239
  - ≤ 33.4: Known homologs (N = 16)
    - > 23.5: N = 2
    - ≤ 23.5: N = 14
- Accessibility (N = 90)
  - > 33.4: Known homologs (N = 74)
    - > 23.5: N = 6
    - ≤ 23.5: N = 68
  - ≤ 33.4: Known homologs (N = 16)
    - > 23.5: N = 2
    - ≤ 23.5: N = 14

**Branch 2: RSS (N = 1385) - Accessibility = 0 (N = 779)**

- Disorder (N = 774)
  - > 33.4: Known homologs (N = 624)
    - > 23.5: N = 68
    - ≤ 23.5: N = 556
  - ≤ 33.4: Known homologs (N = 150)
    - > 23.5: N = 5
    - ≤ 23.5: N = 145
- Accessibility (N = 779)
  - > 33.4: Known homologs (N = 4)
    - > 23.5: N = 0 (dashed line)
    - ≤ 23.5: N = 4
  - ≤ 33.4: Known homologs (N = 1)
    - > 23.5: N = 0 (dashed line)
    - ≤ 23.5: N = 1

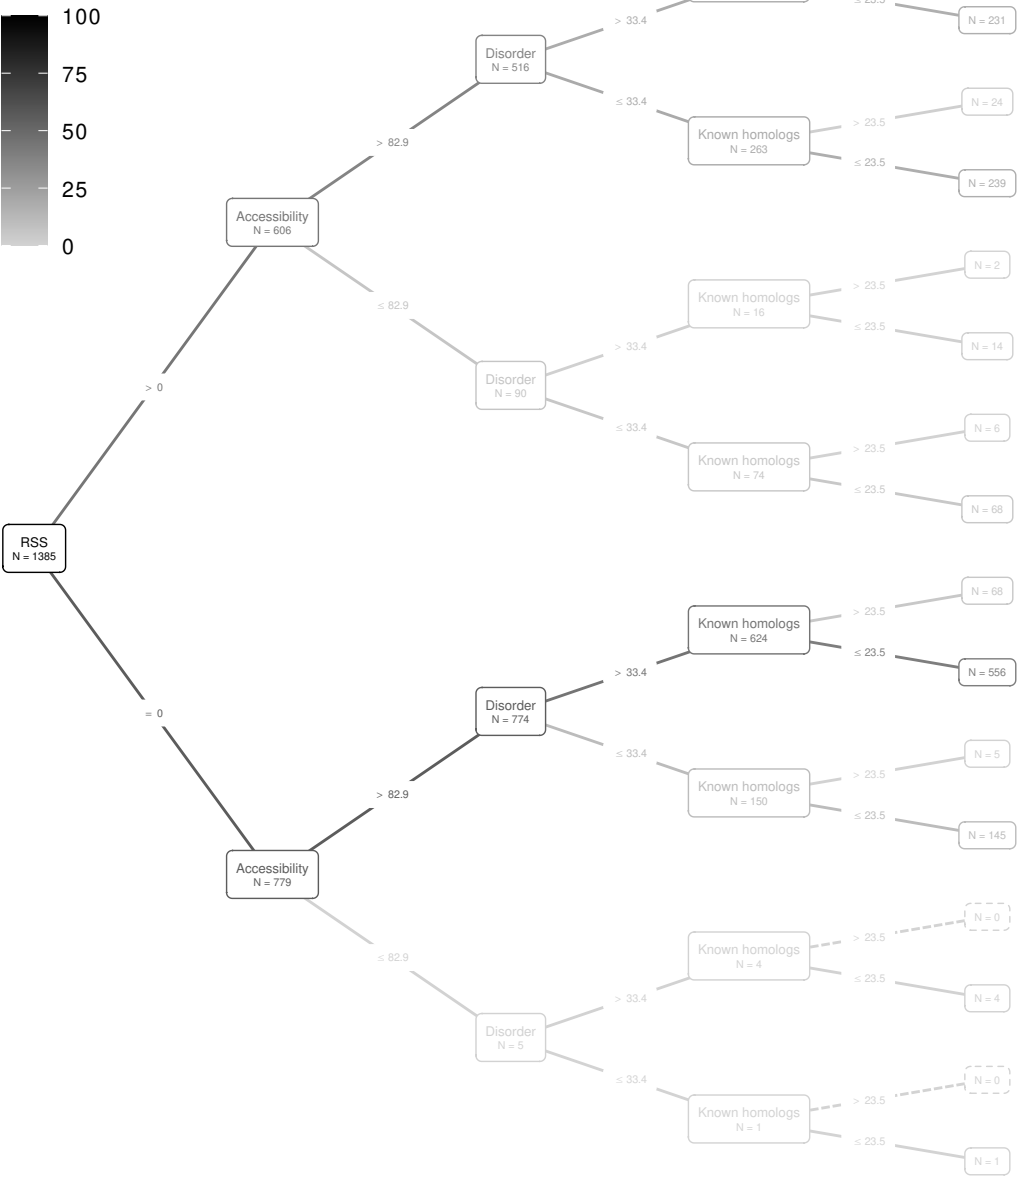

% long soluble-like  
VL foldable segments  
(DROME)

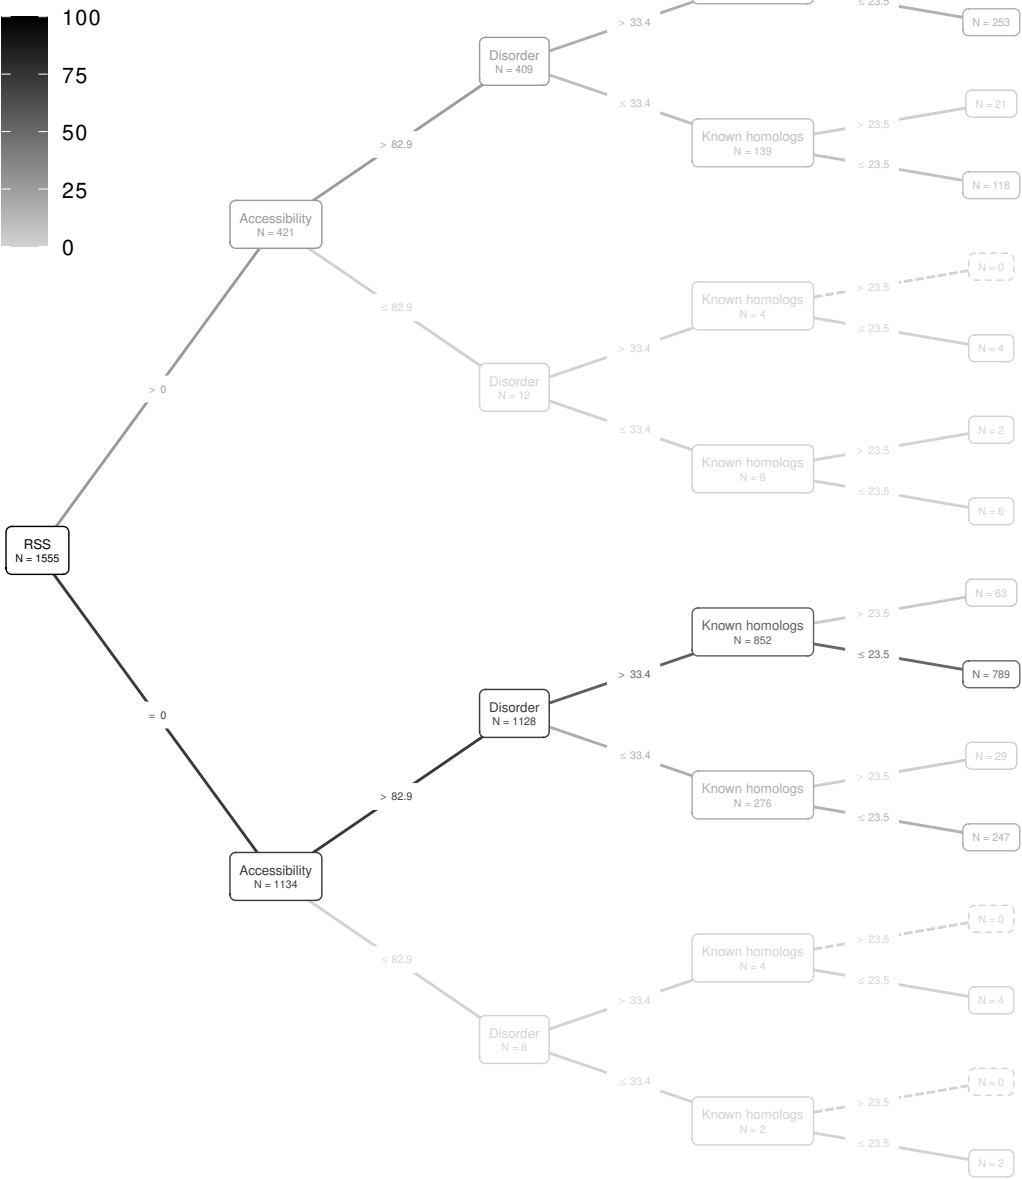

% long soluble-like  
VL foldable segments  
(ECOLI)

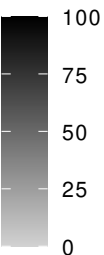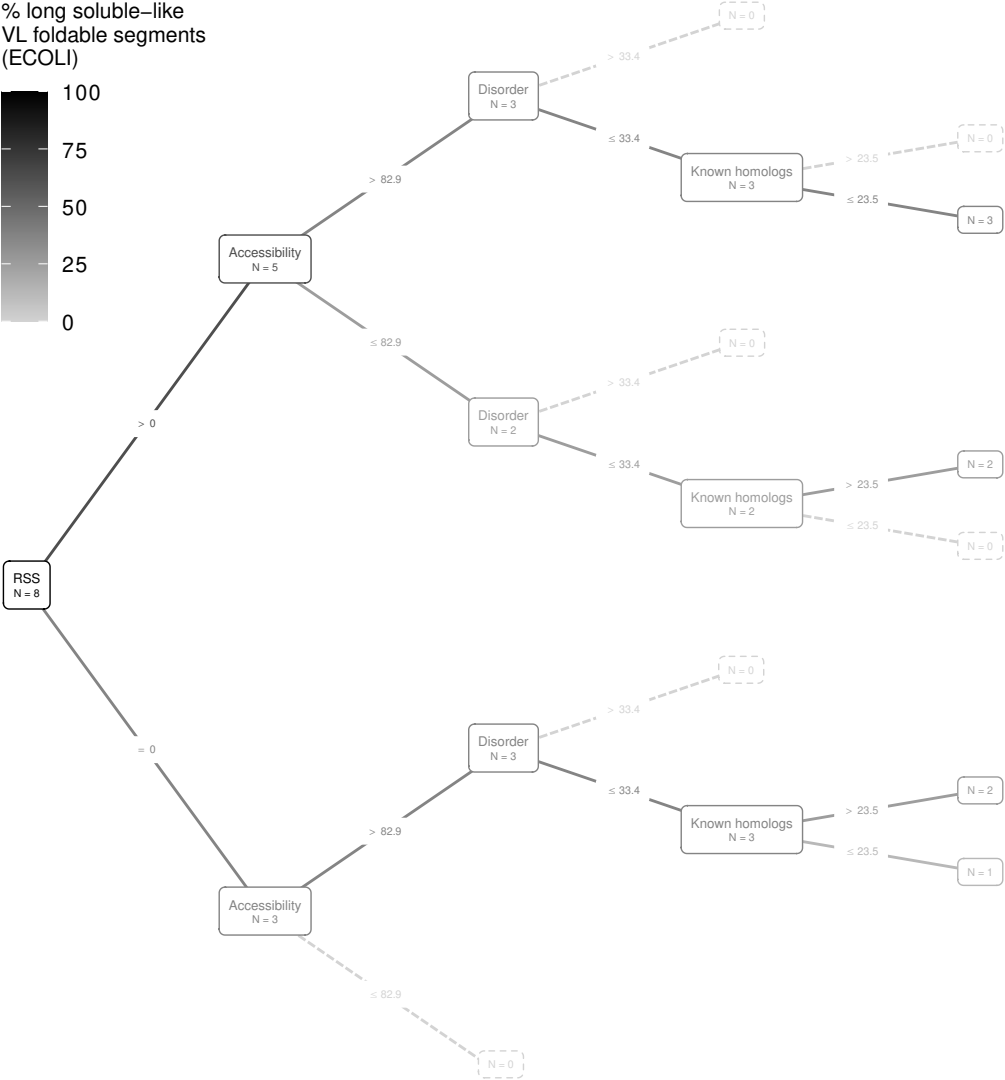

% long soluble-like  
VL foldable segments  
(HUMAN)

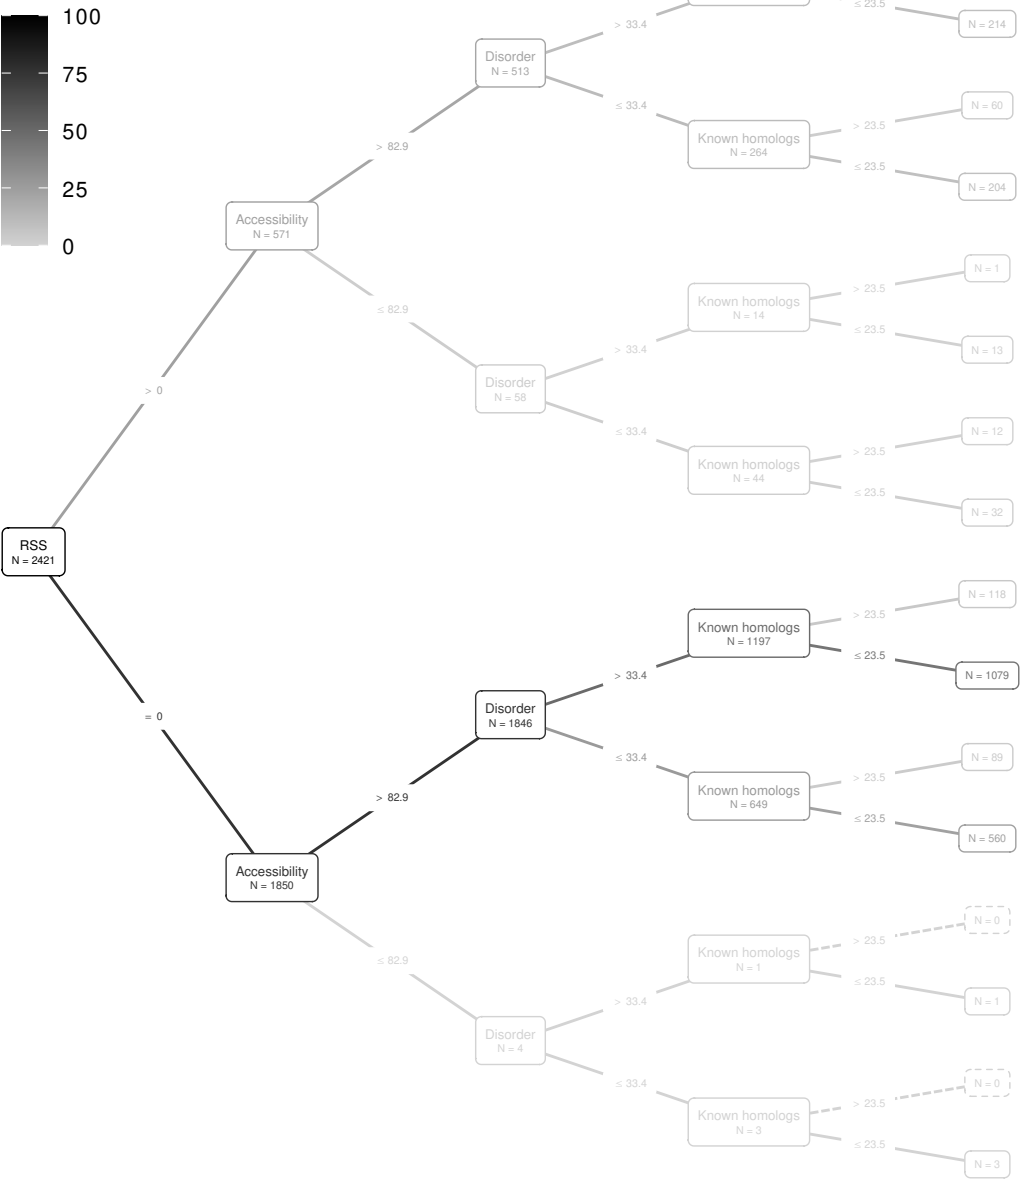



% long soluble-like  
VL foldable segments  
(LEIIN)

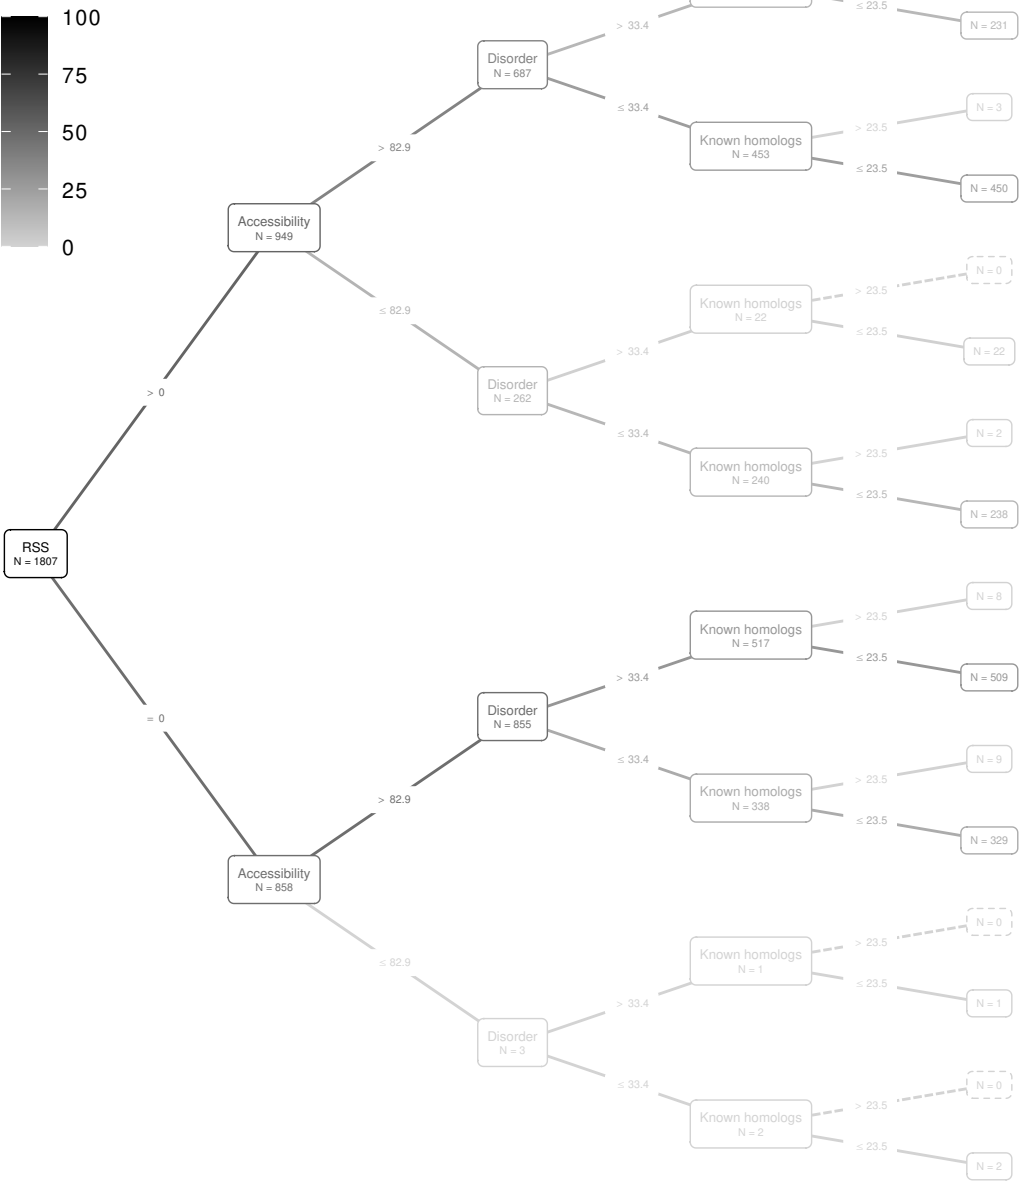

% long soluble-like  
VL foldable segments  
(MAIZE)

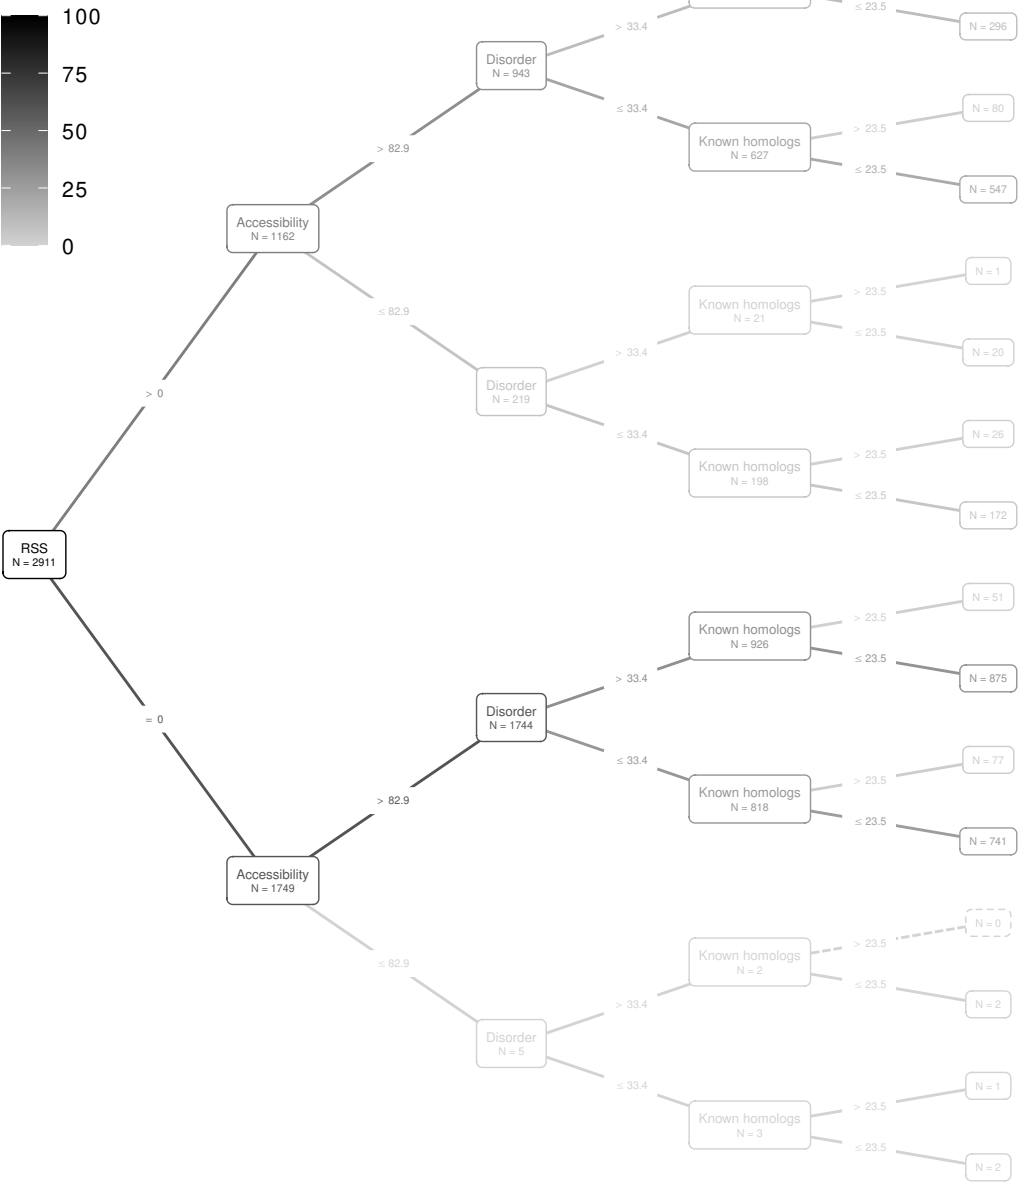

% long soluble-like  
VL foldable segments  
(METJA)

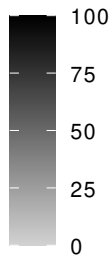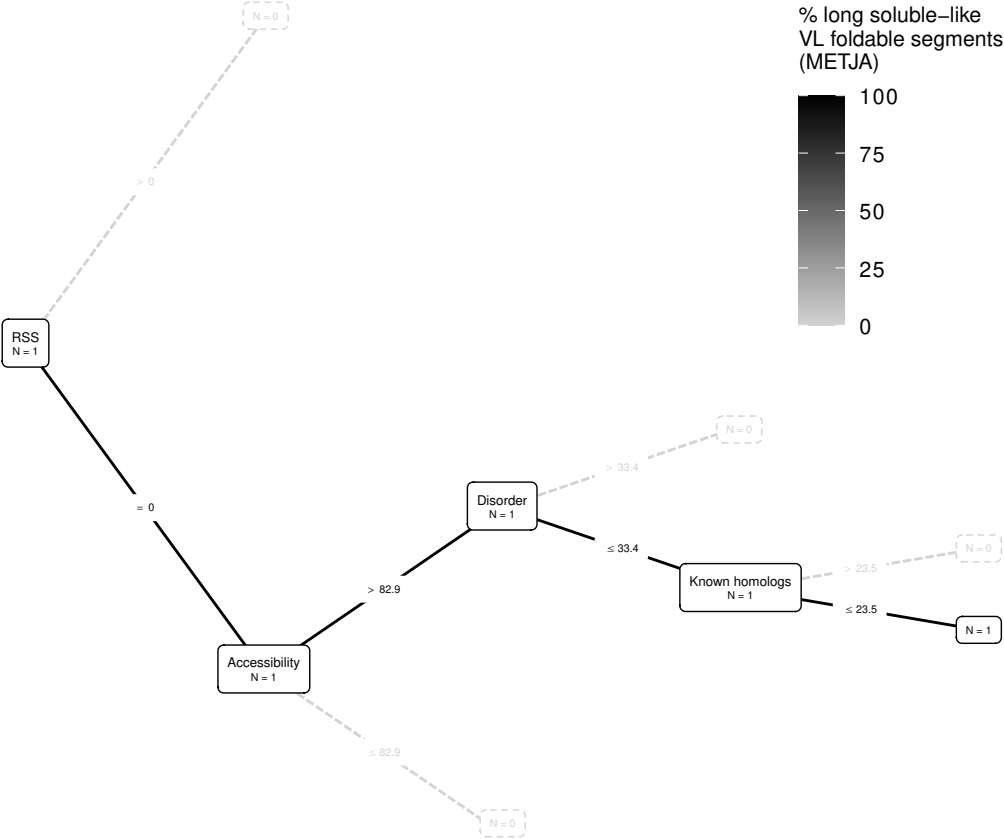

% long soluble-like  
VL foldable segments  
(MOUSE)

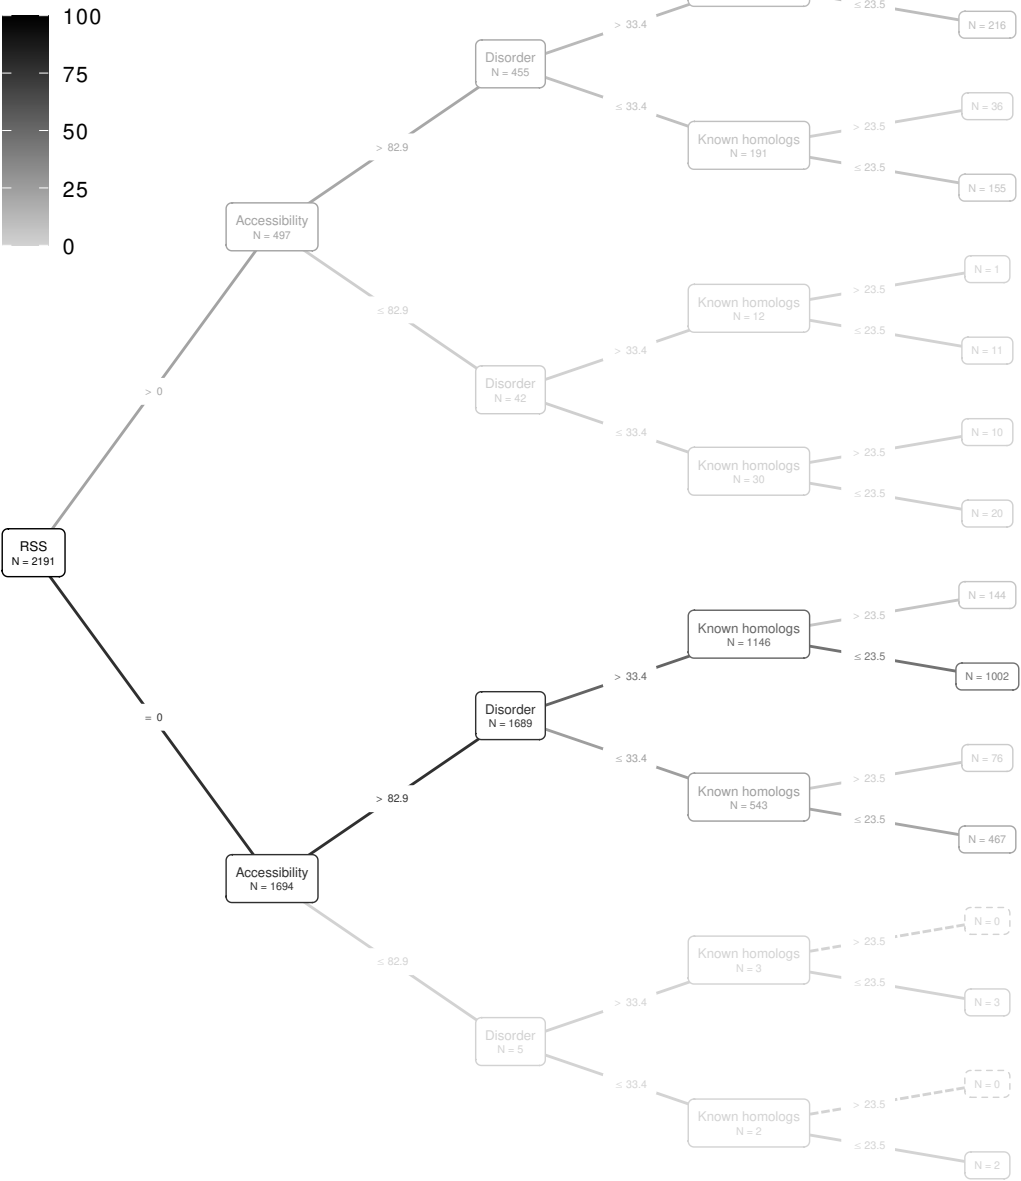

% long soluble-like  
VL foldable segments  
(MYCTU)

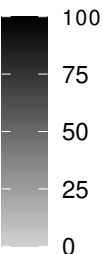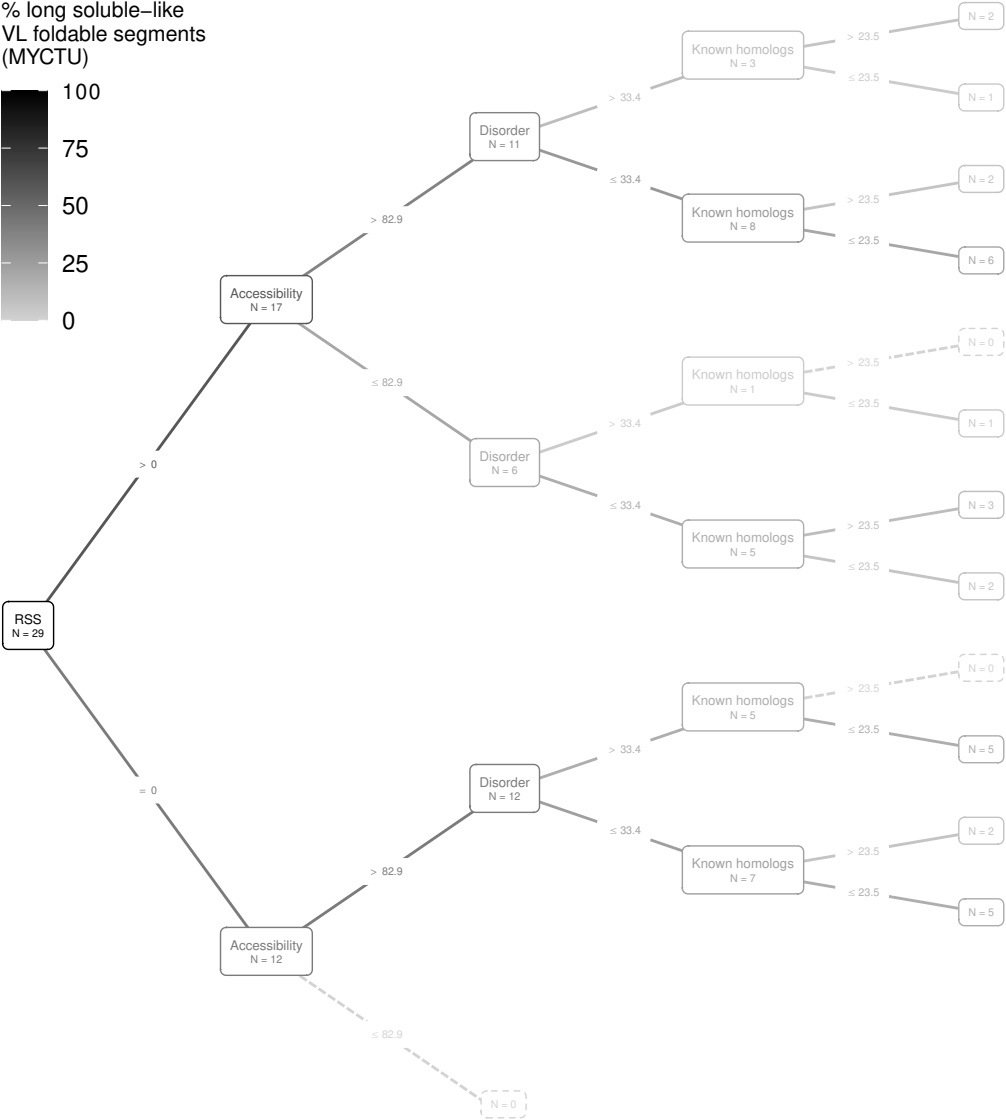

100  
75  
50  
25  
0

RSS  
N = 2809

> 0

Accessability  
N = 1590

> 82.9

Disorder  
N = 1064

> 33.4

Known homologs  
N = 765

> 23.5

N = 255

≤ 23.5

N = 169

≤ 23.5

N = 596

≤ 33.4

Known homologs  
N = 67

> 23.5

N = 17

≤ 23.5

N = 50

> 33.4

Known homologs  
N = 459

> 23.5

N = 154

≤ 23.5

N = 305

≤ 33.4

Disorder  
N = 526

> 33.4

Known homologs  
N = 597

> 23.5

N = 43

≤ 23.5

N = 554

≤ 33.4

Known homologs  
N = 618

> 23.5

N = 86

≤ 23.5

N = 532

≤ 33.4

Disorder  
N = 1215

> 82.9

Accessability  
N = 1219

≤ 82.9

Disorder  
N = 4

> 33.4

Known homologs  
N = 1

> 23.5

N = 0

≤ 23.5

N = 1

≤ 33.4

Known homologs  
N = 3

> 23.5

N = 2

≤ 23.5

N = 1

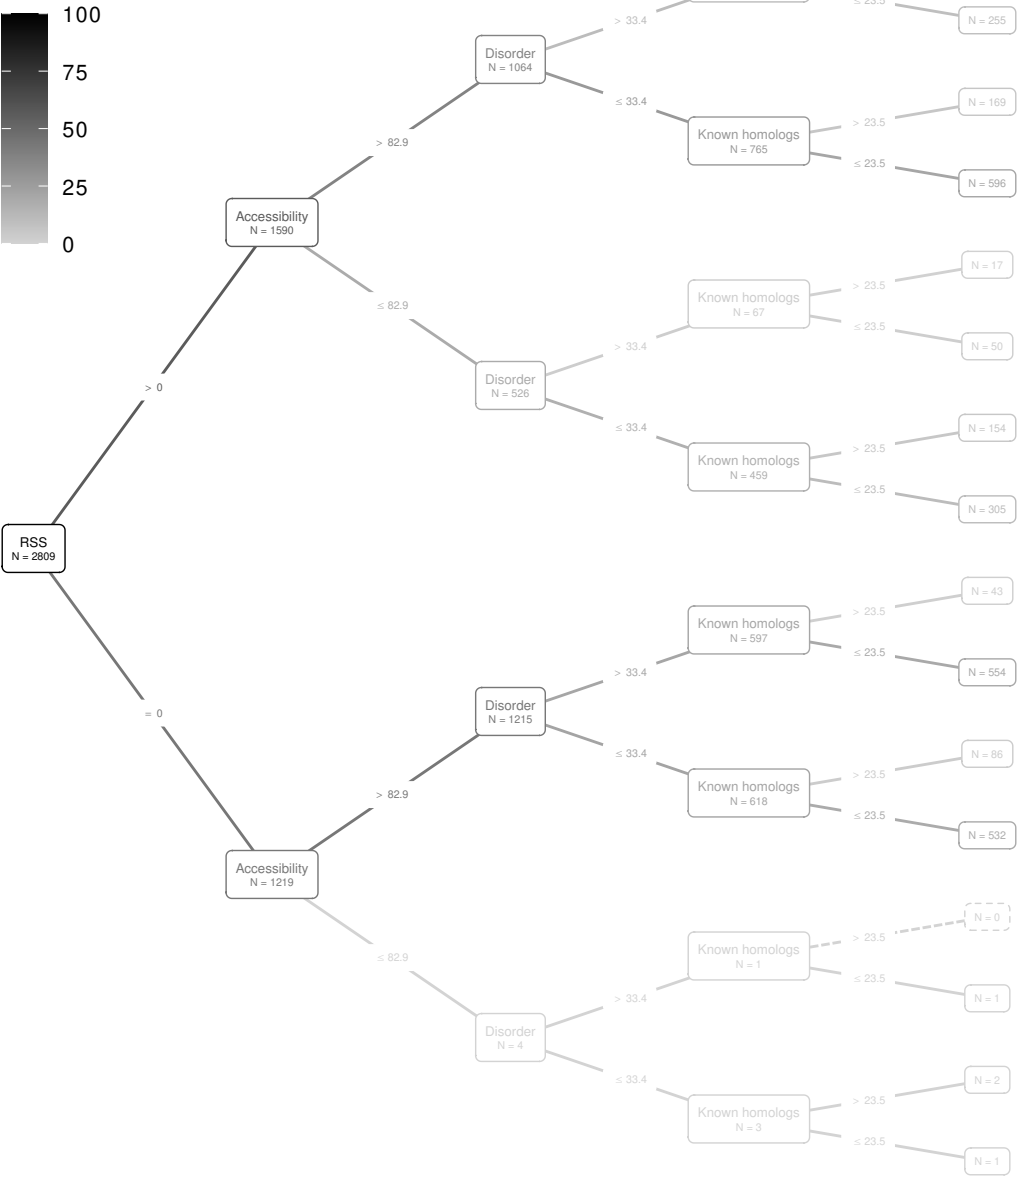

% long soluble-like  
VL foldable segments  
(PLAF7)

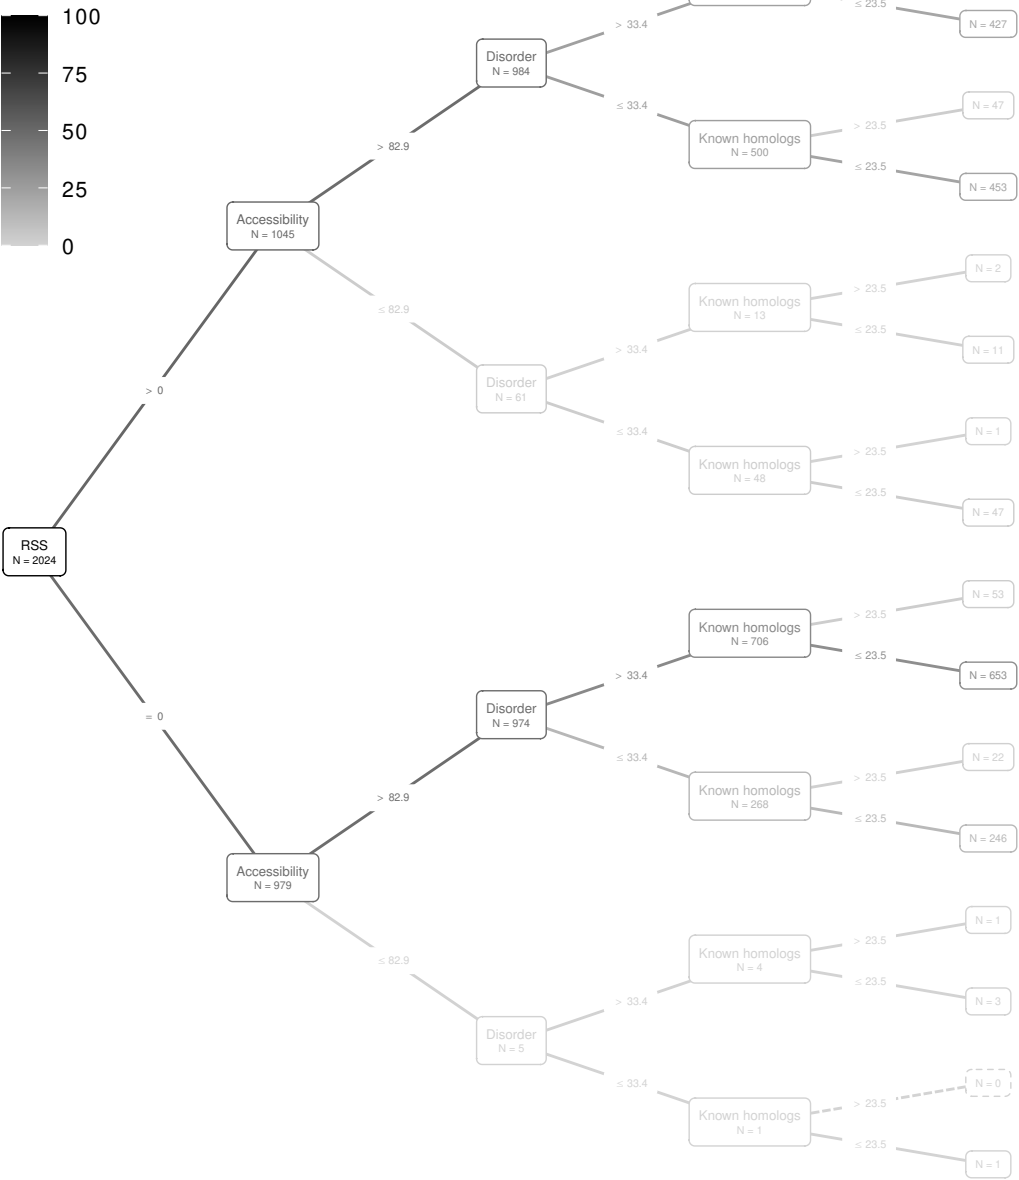

% long soluble-like  
VL foldable segments  
(RAT)

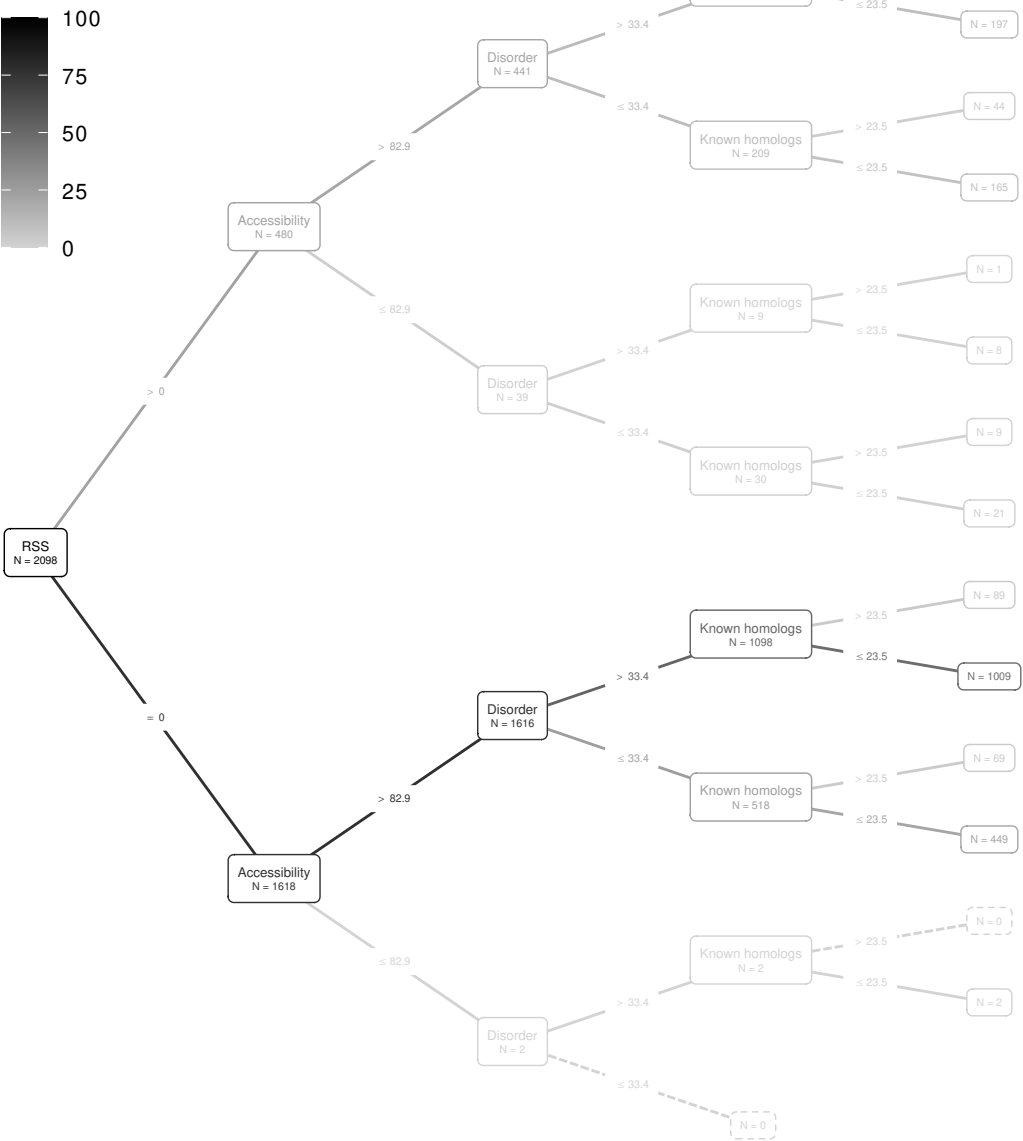



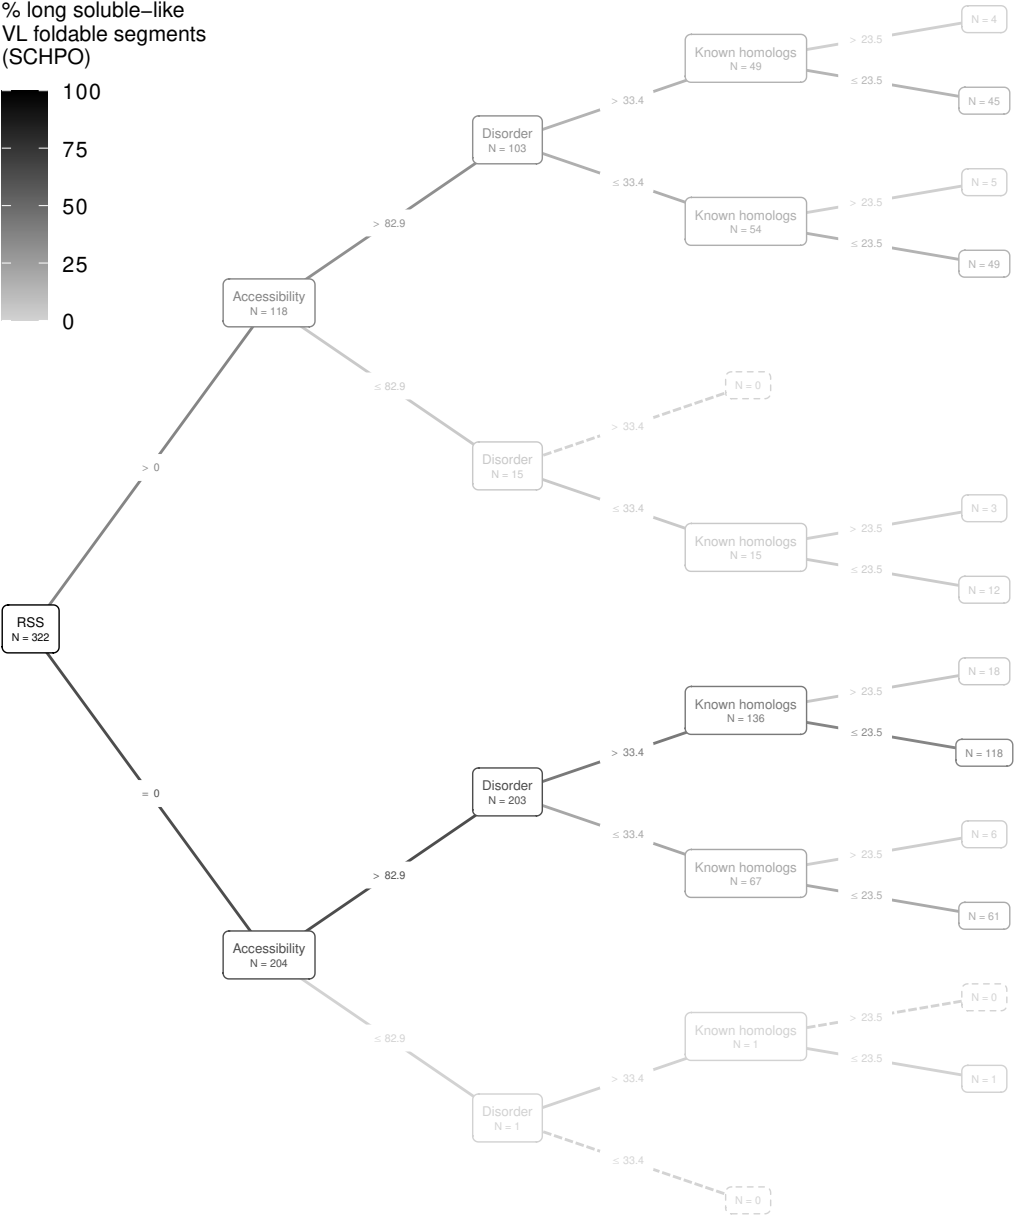

% long soluble-like  
VL foldable segments  
(SOYBN)

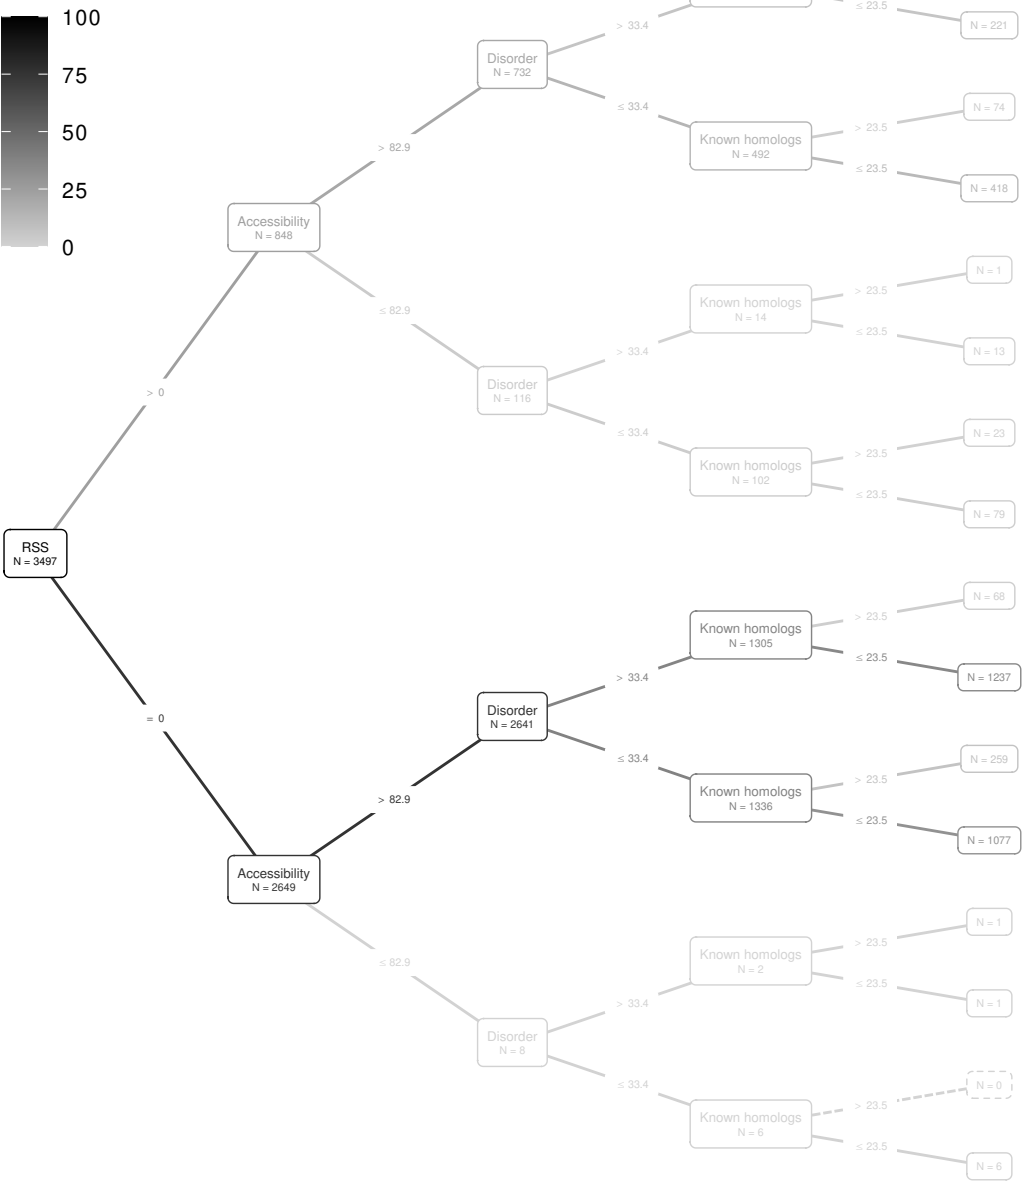

% long soluble-like  
VL foldable segments  
(STAA8)

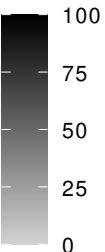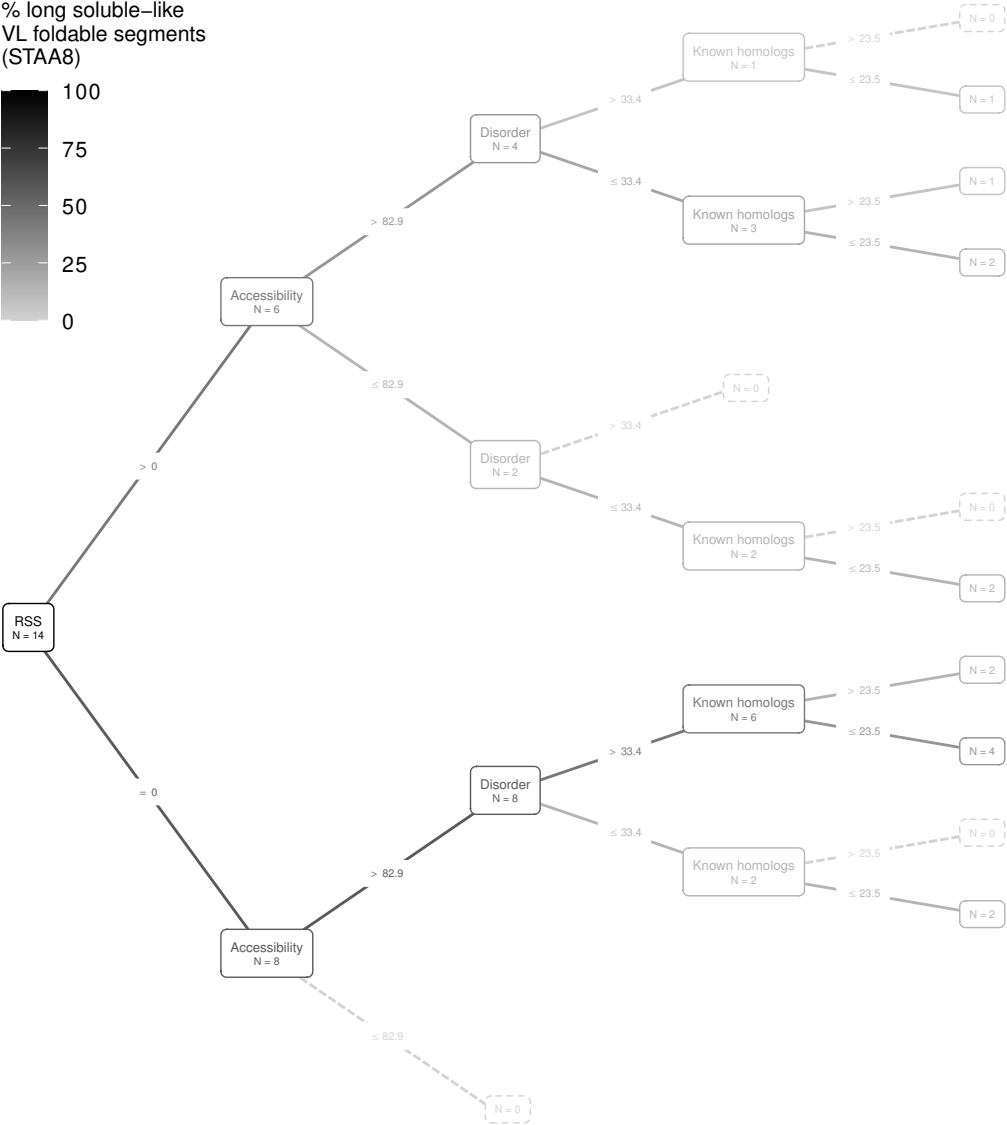

% long soluble-like  
VL foldable segments  
(TRYCC)

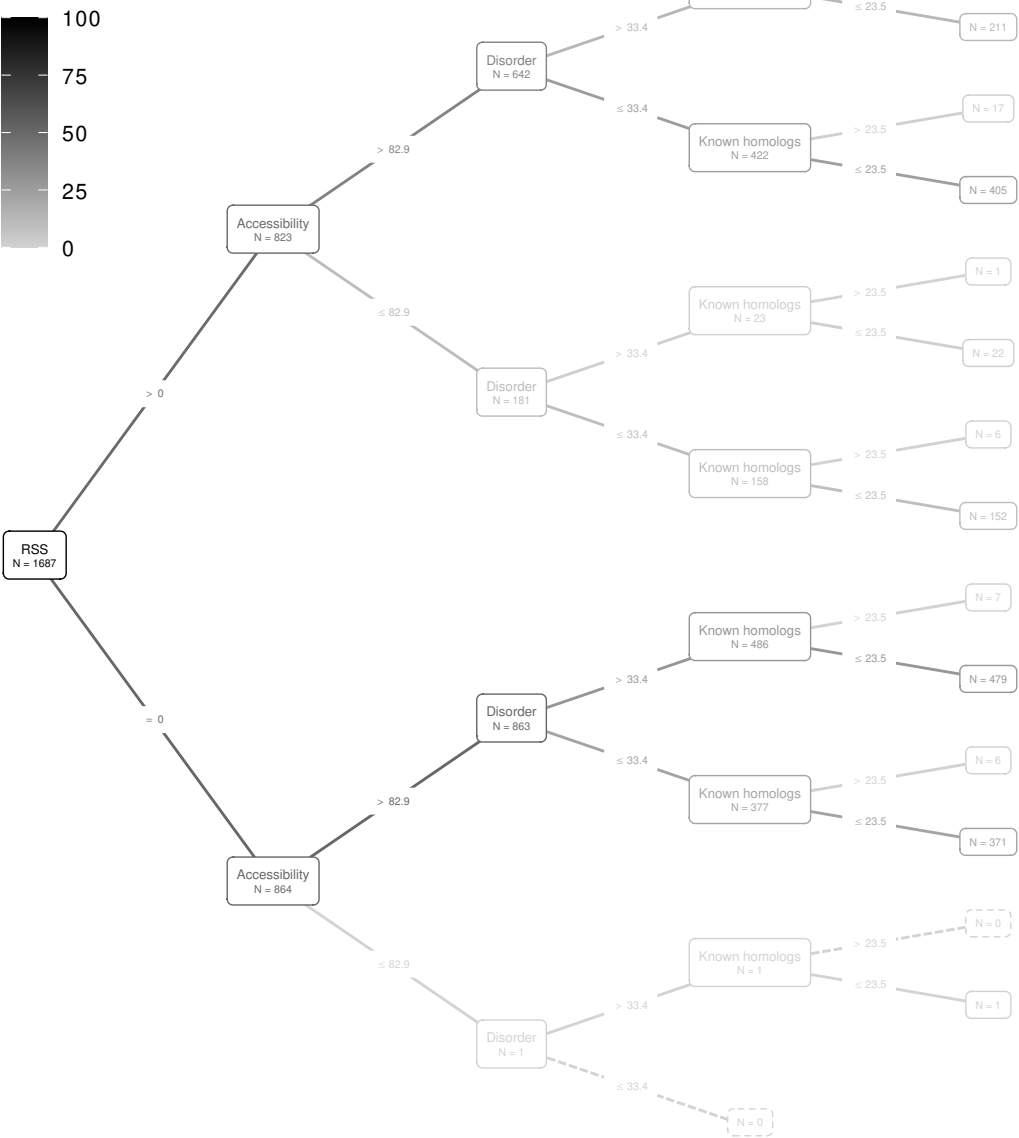

% long soluble-like  
VL foldable segments  
(YEAST)

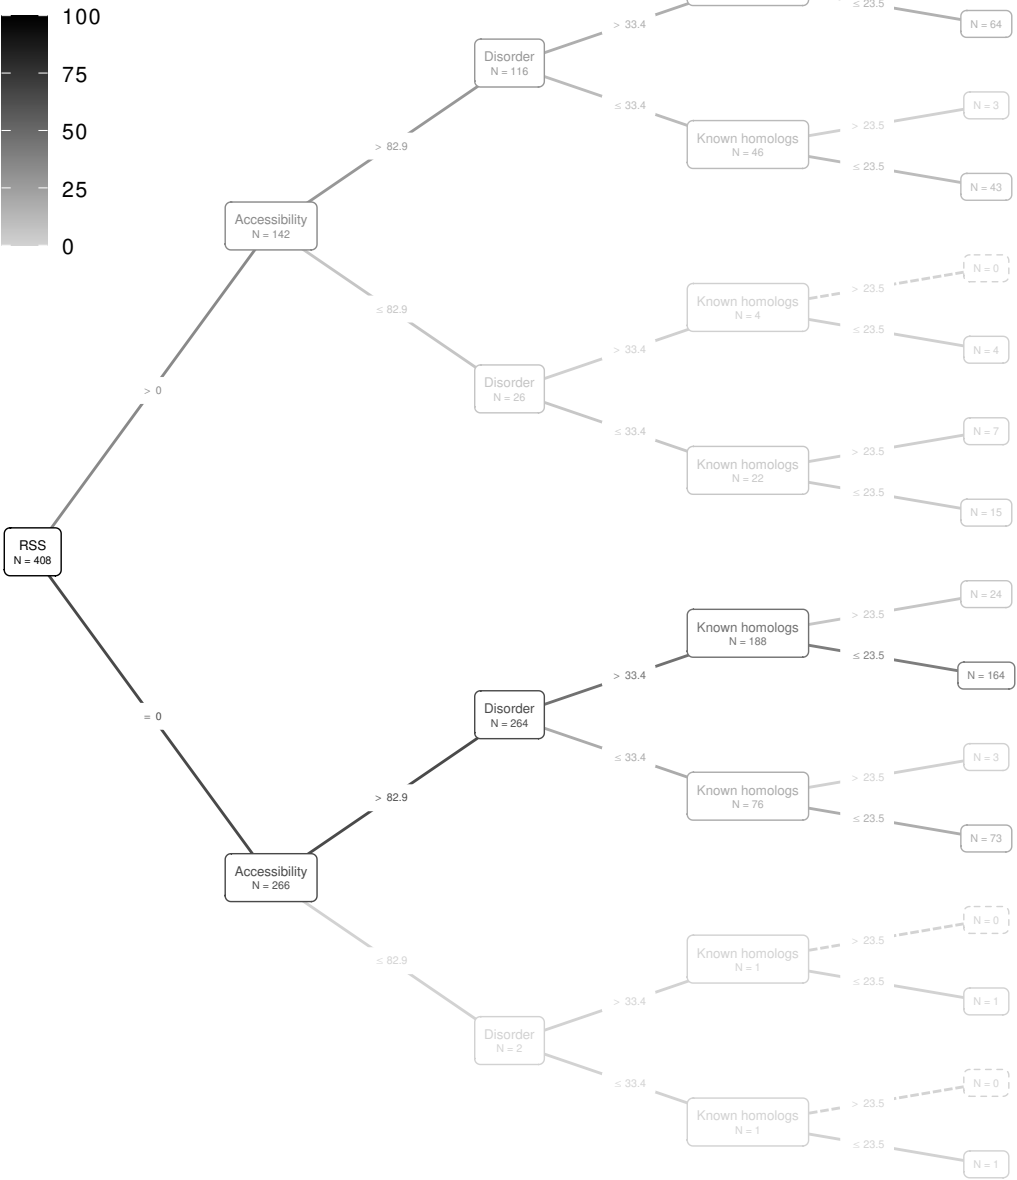

Supplement: s1 [file s1]
