# Supplementary material for: Digging into the 3D Structure Predictions of AlphaFold2 with Low Confidence: Disorder and Beyond
Source: MDPI journal article supplement (doi:10.3390/biom12101467), 2022-10-13

% long soluble-like  
VH foldable segments  
(ARATH)

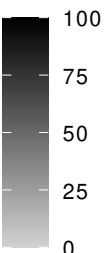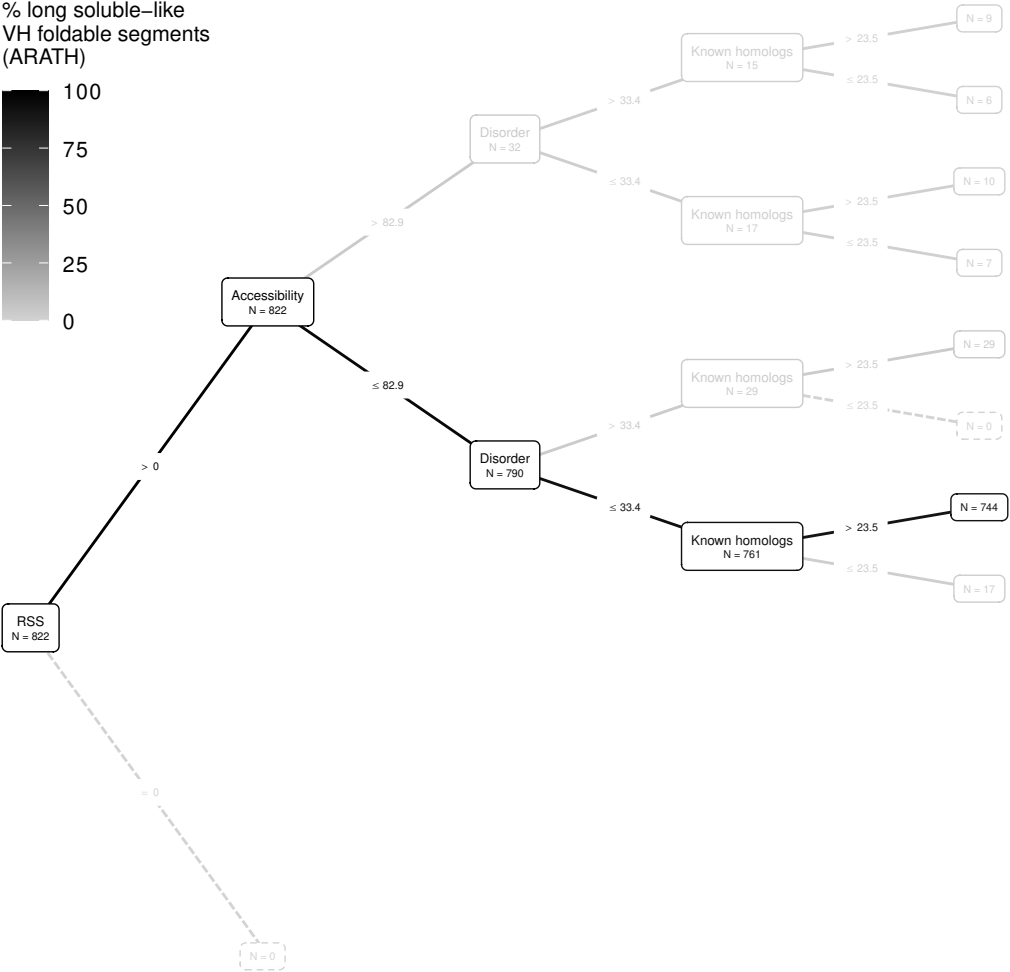

% long soluble-like  
VH foldable segments  
(CAEEL)

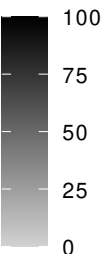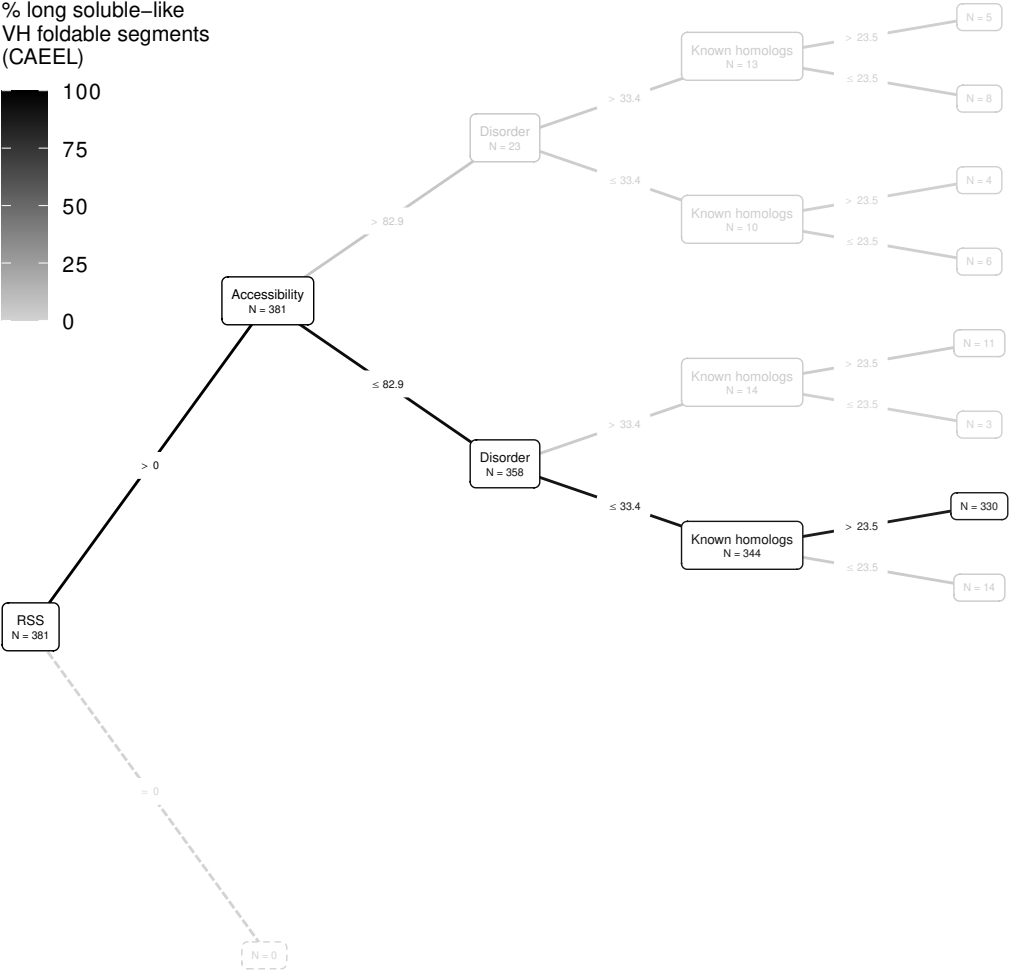

% long soluble-like  
VH foldable segments  
(CANAL)

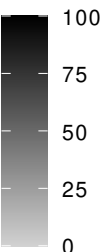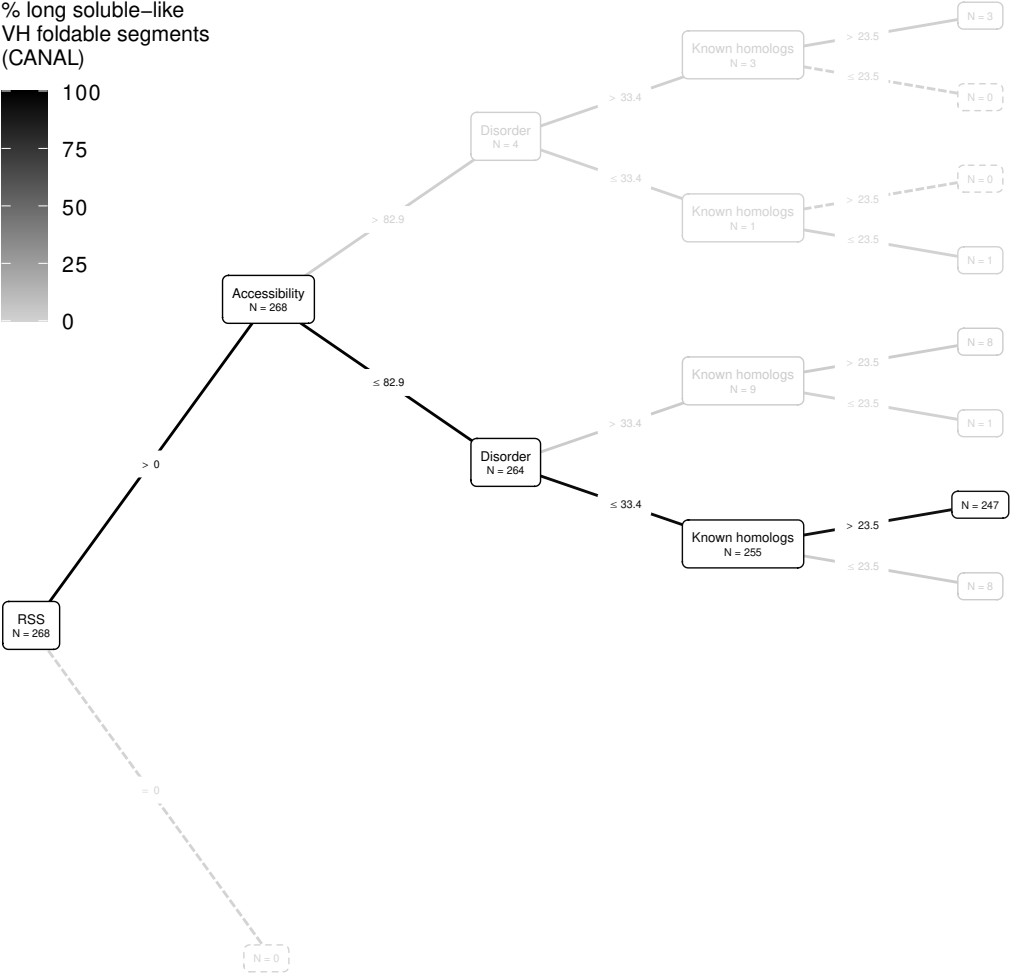

% long soluble-like  
VH foldable segments  
(DANRE)

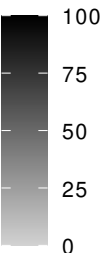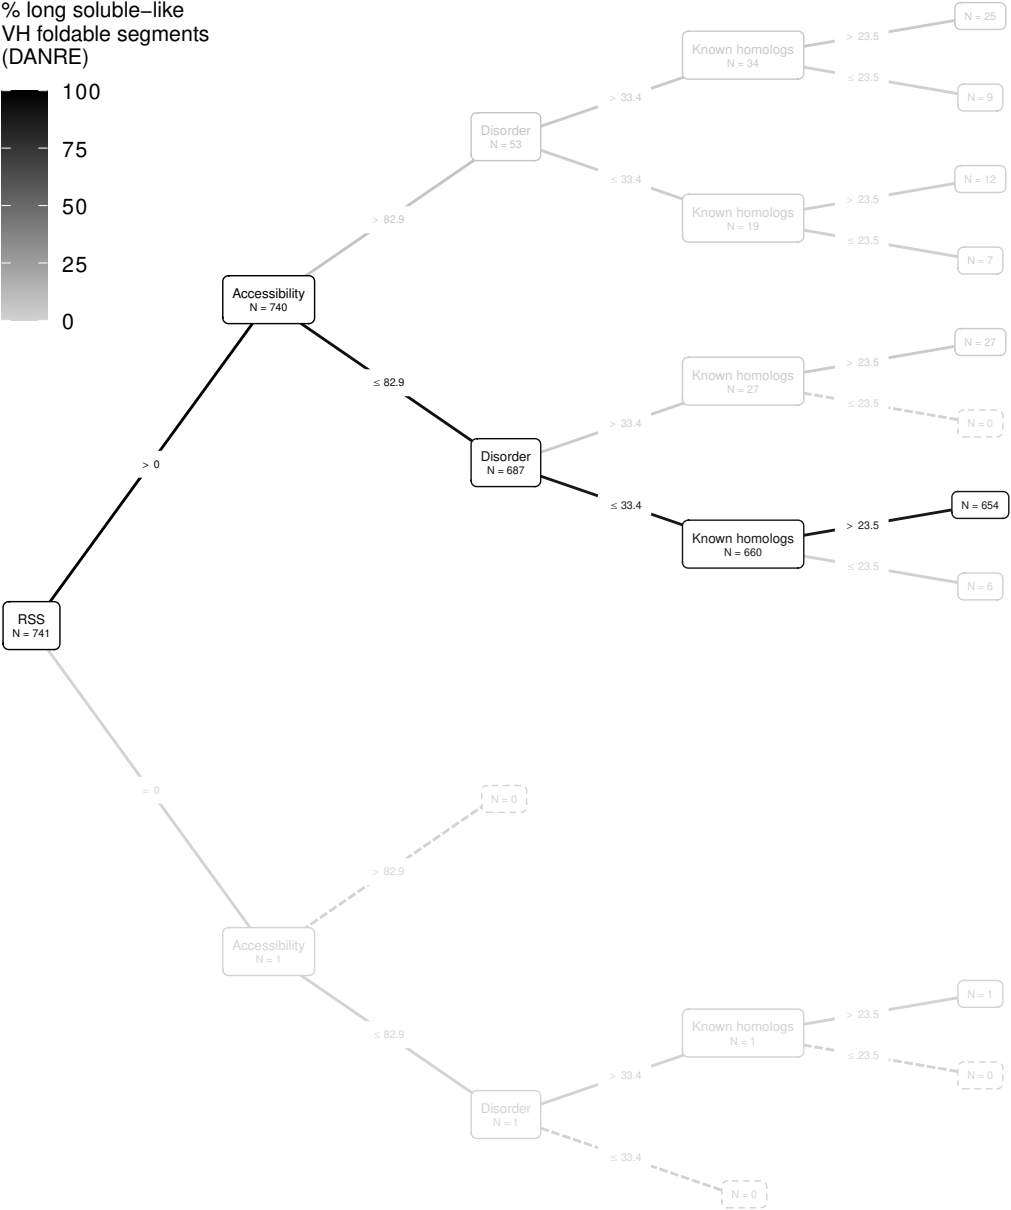

% long soluble-like  
VH foldable segments  
(DICI)

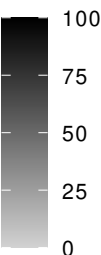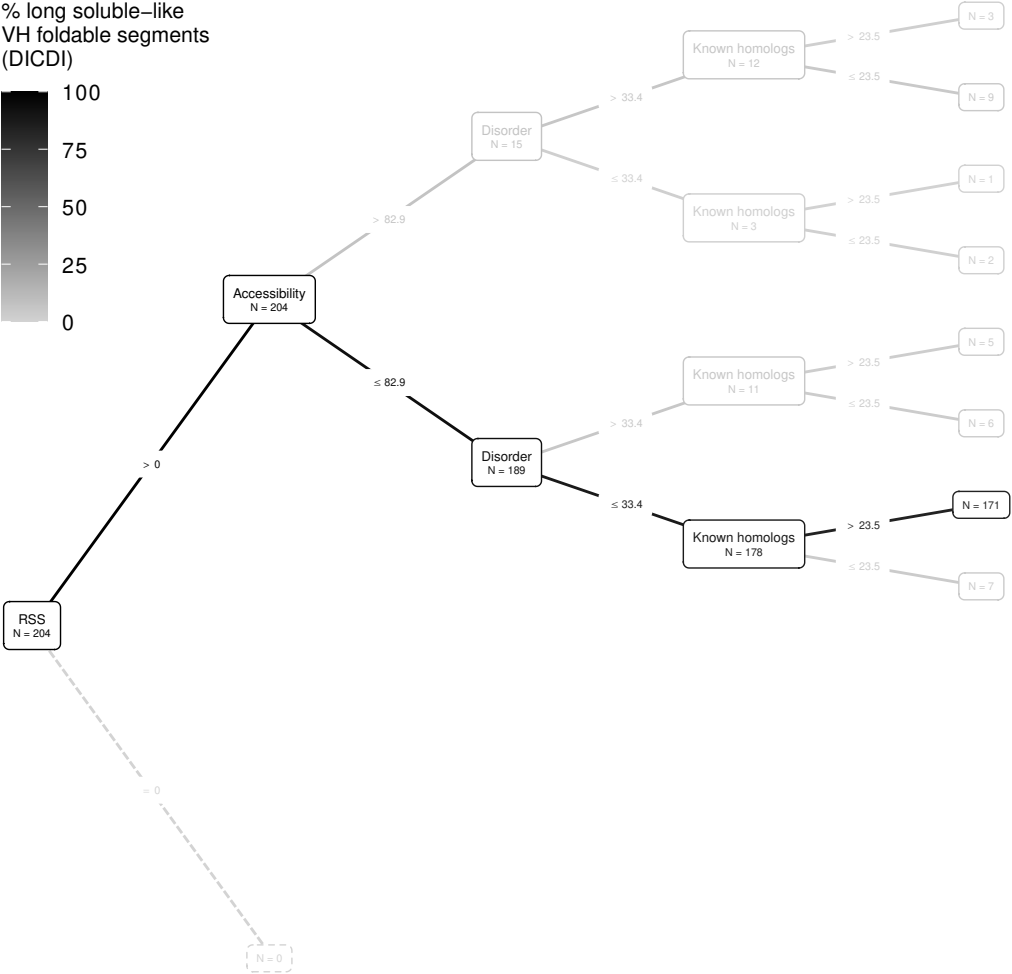

% long soluble-like  
VH foldable segments  
(DROME)

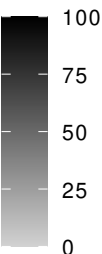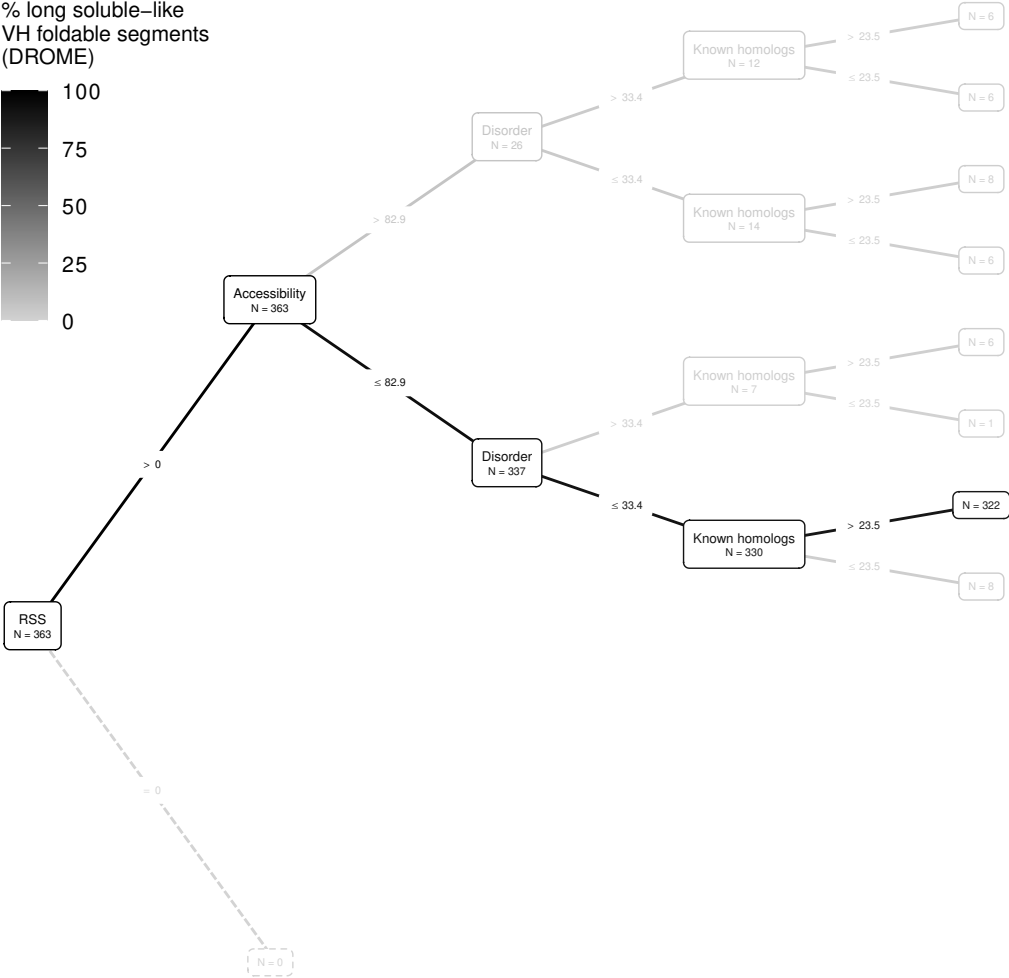

% long soluble-like  
VH foldable segments  
(ECOLI)

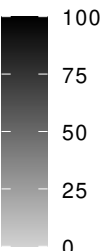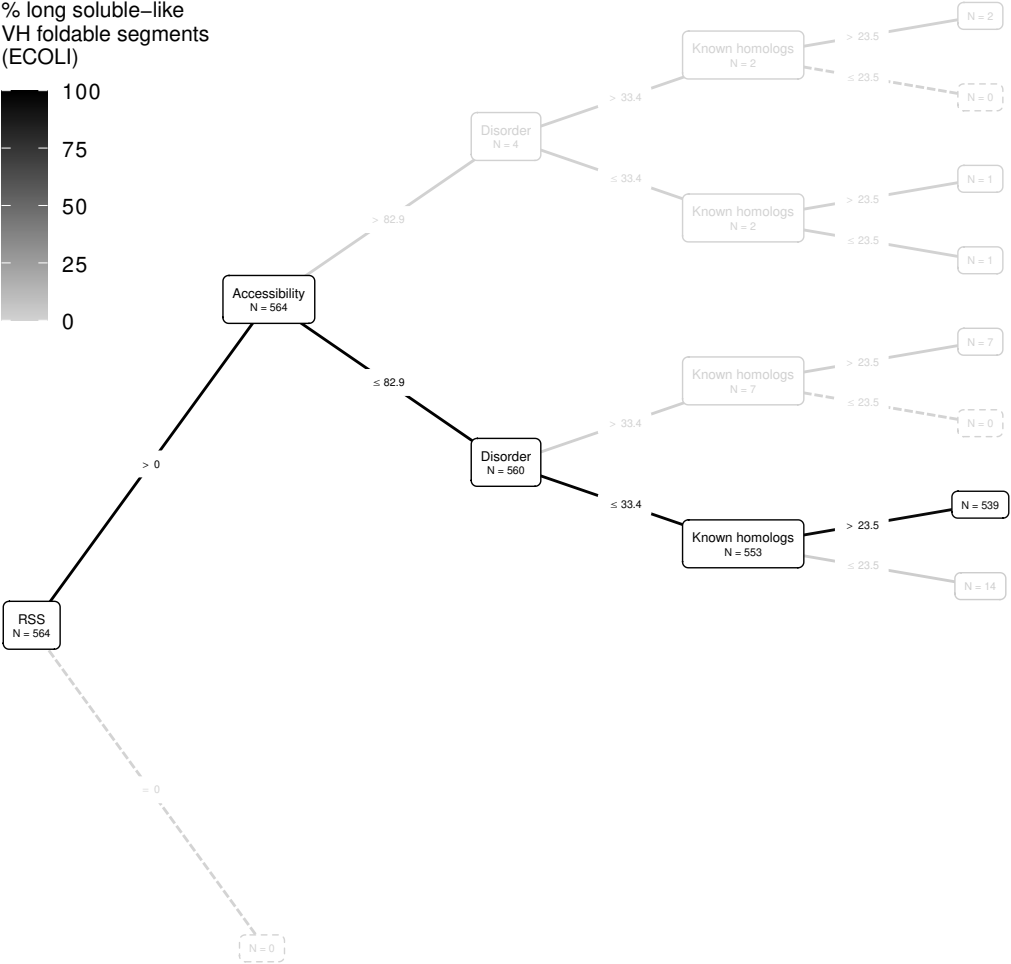

% long soluble-like  
VH foldable segments  
(HUMAN)

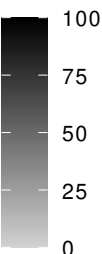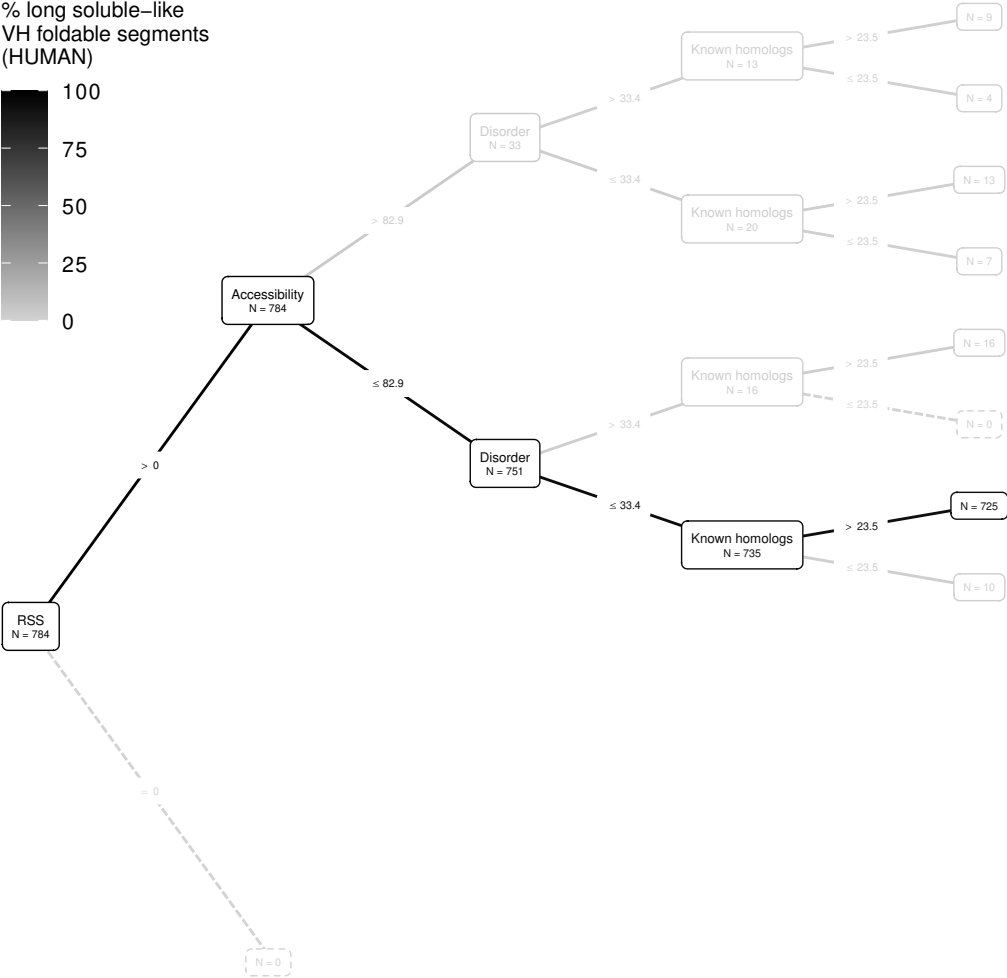



% long soluble-like  
VH foldable segments  
(LEIIN)

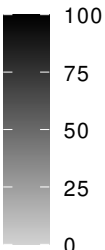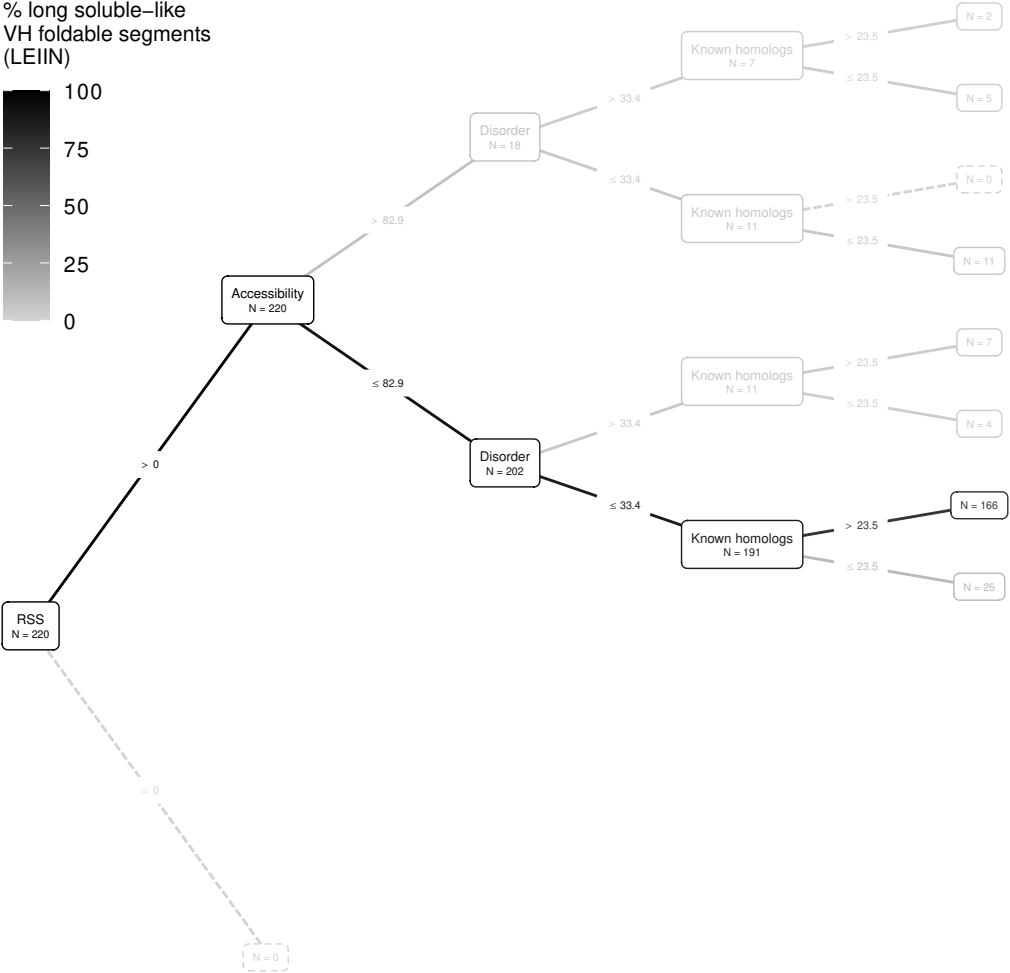

% long soluble-like  
VH foldable segments  
(MAIZE)

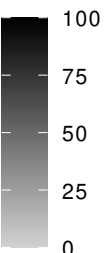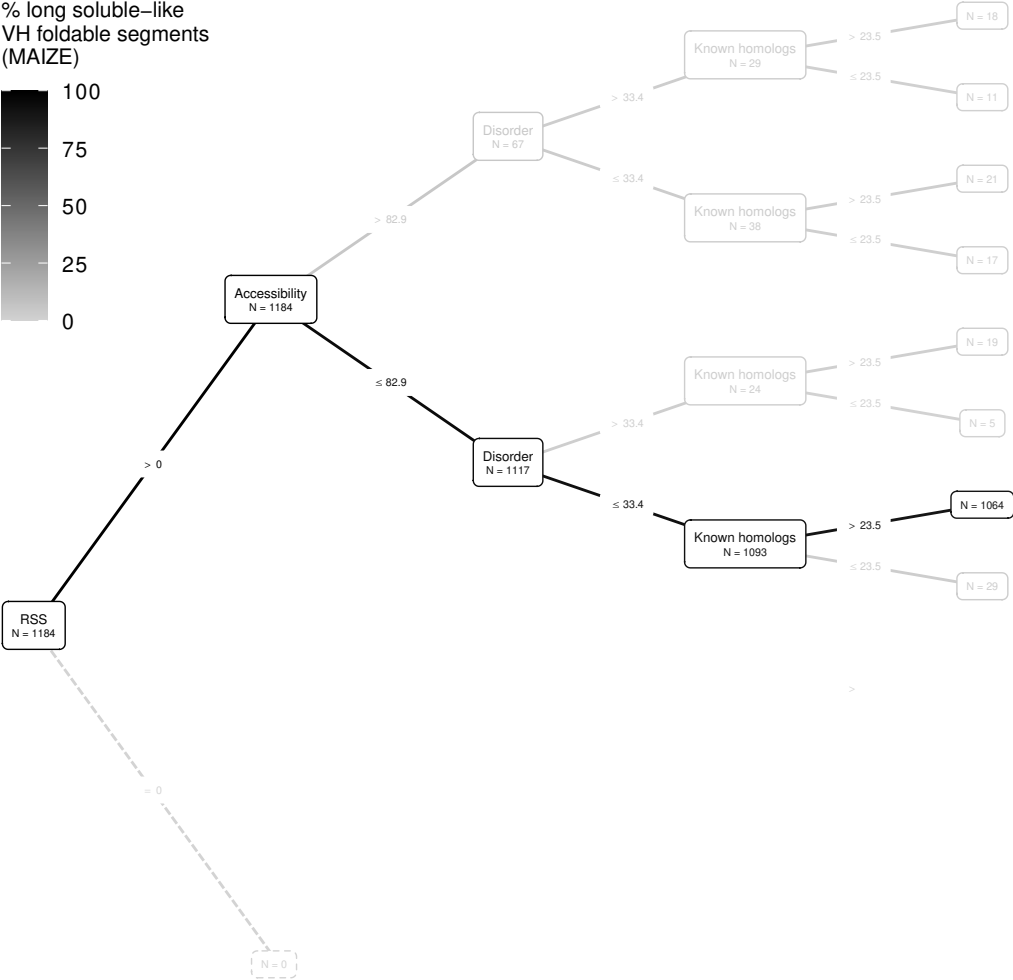

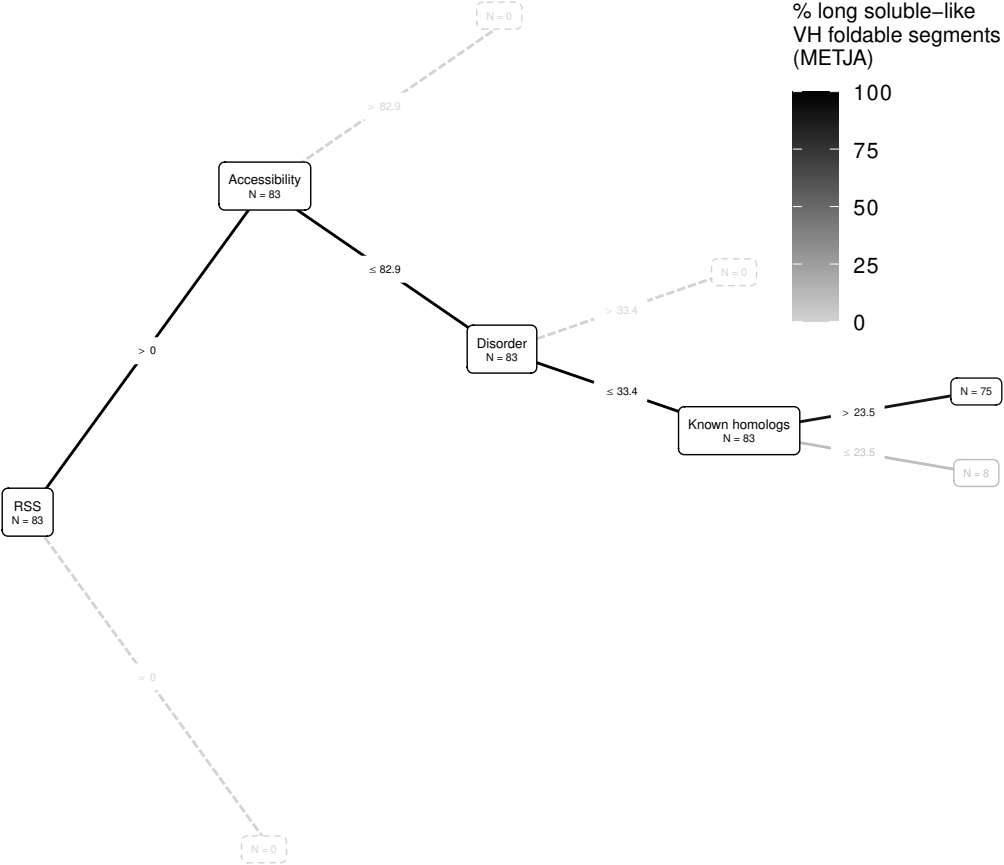

% long soluble-like  
VH foldable segments  
(MOUSE)

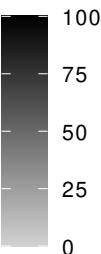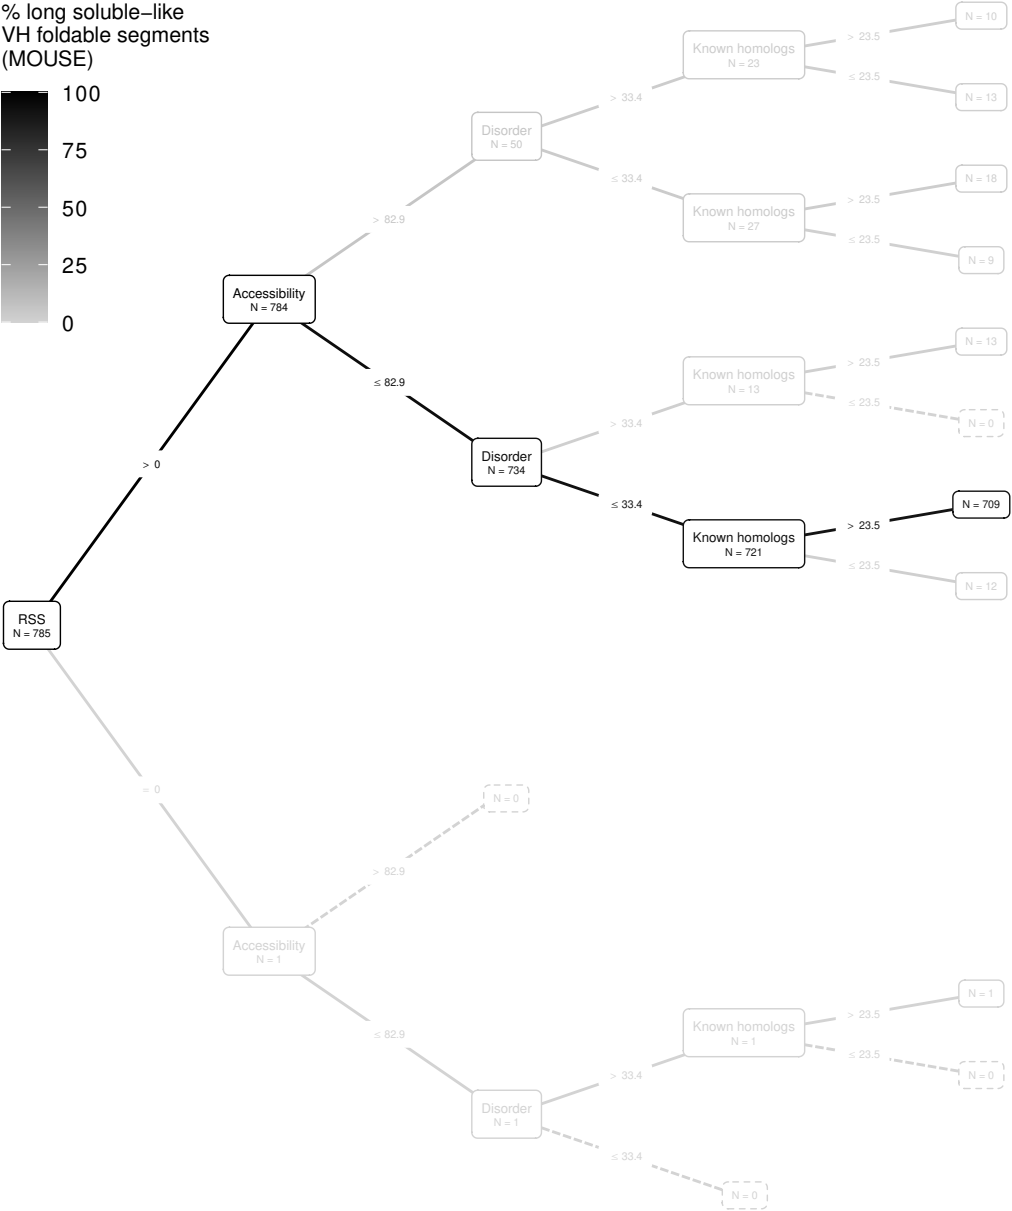

% long soluble-like  
VH foldable segments  
(MYCTU)

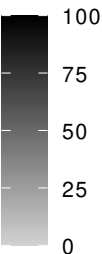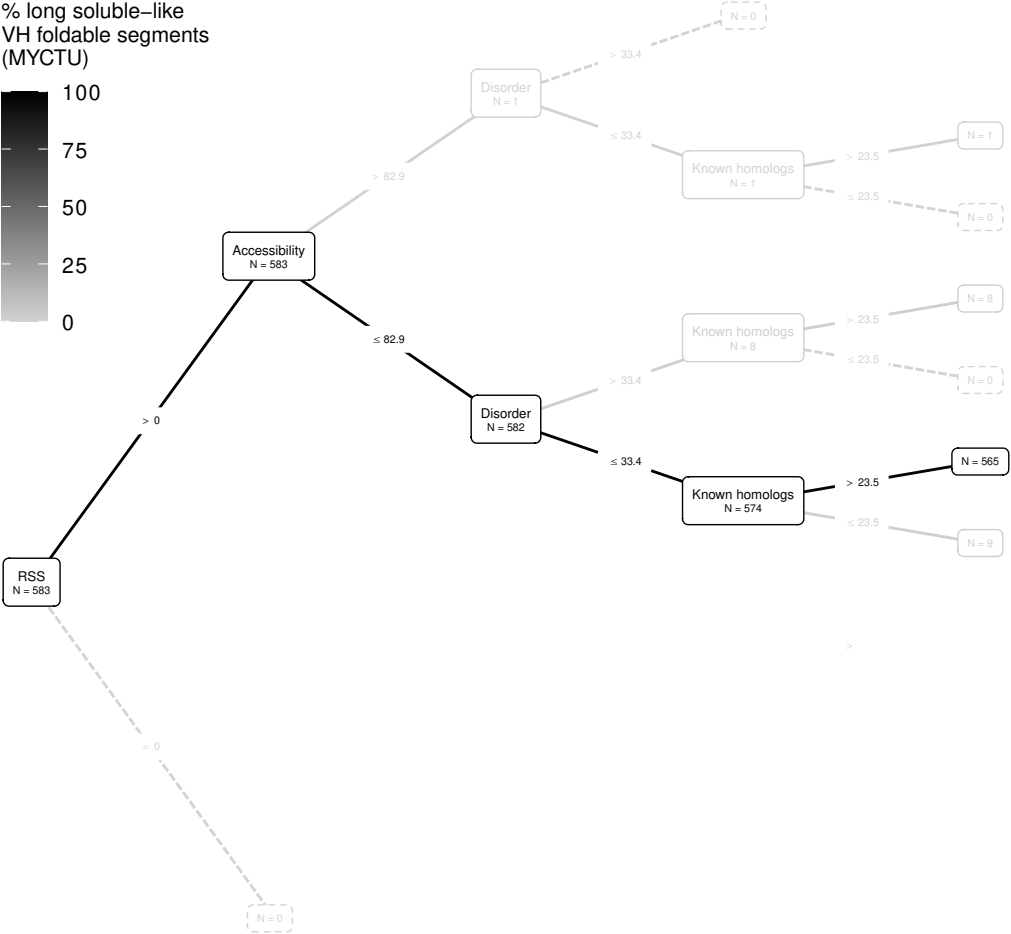

% long soluble-like  
VH foldable segments  
(ORYSJ)

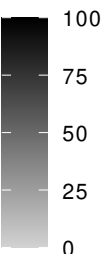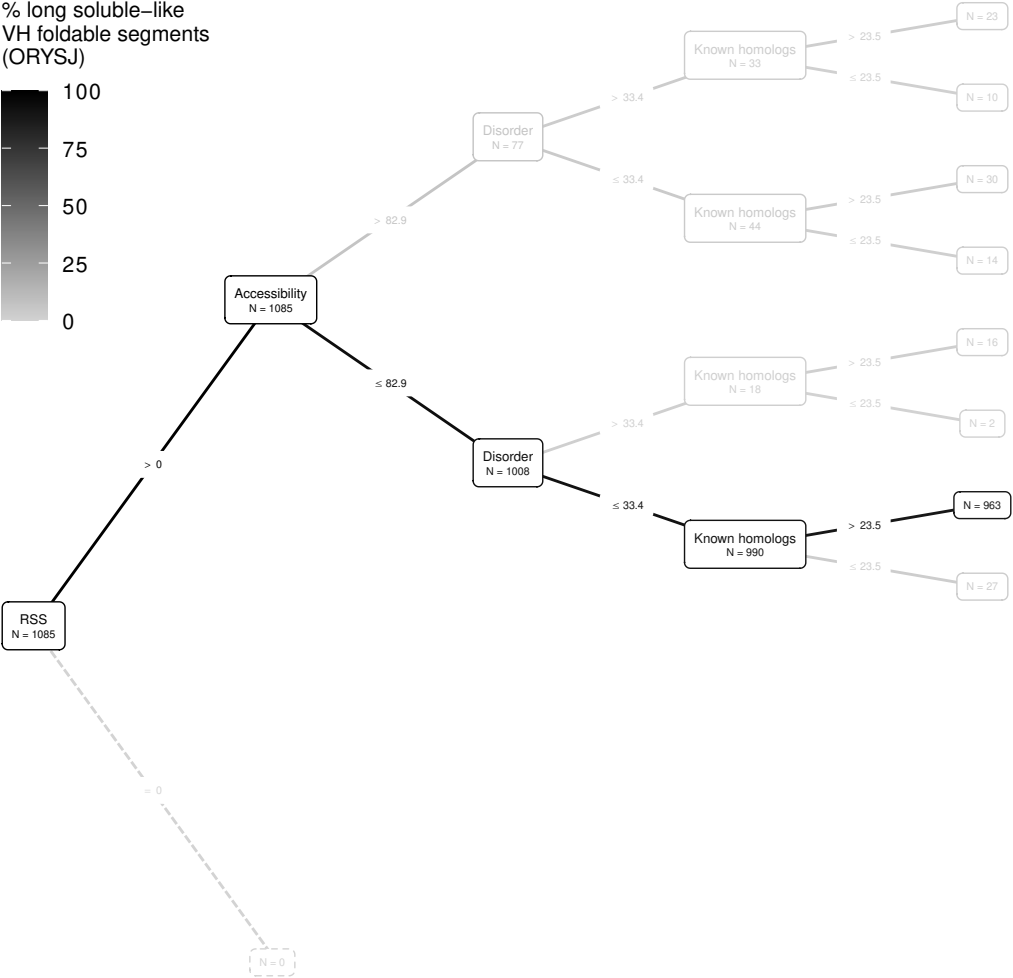

% long soluble-like  
VH foldable segments  
(PLAF7)

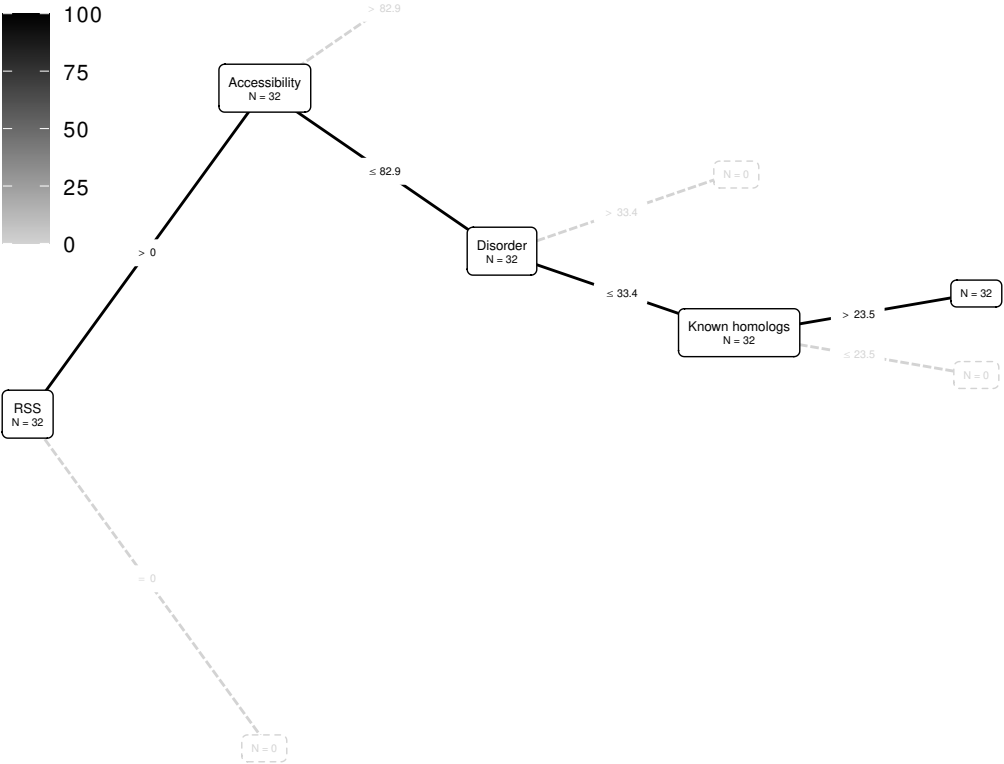

% long soluble-like  
VH foldable segments  
(RAT)

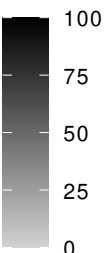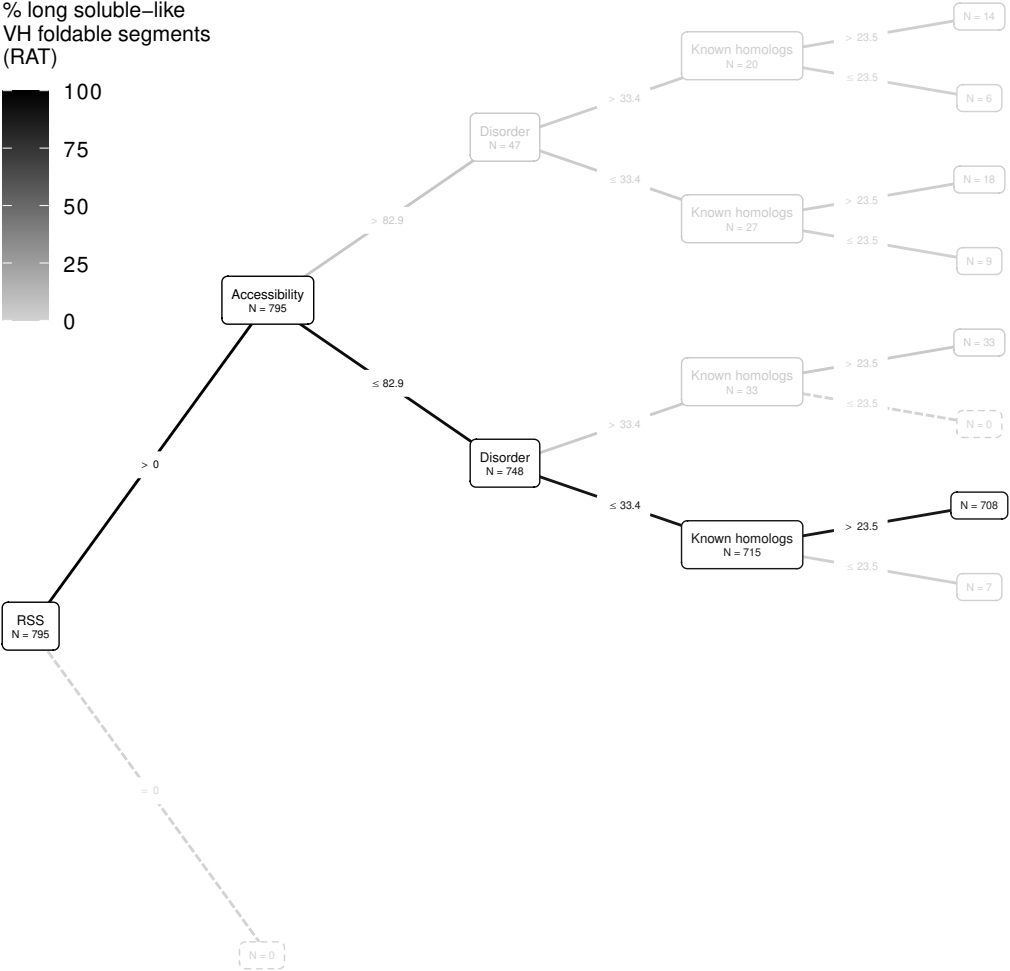



% long soluble-like  
VH foldable segments  
(SCHPO)

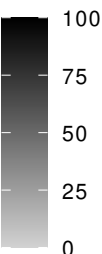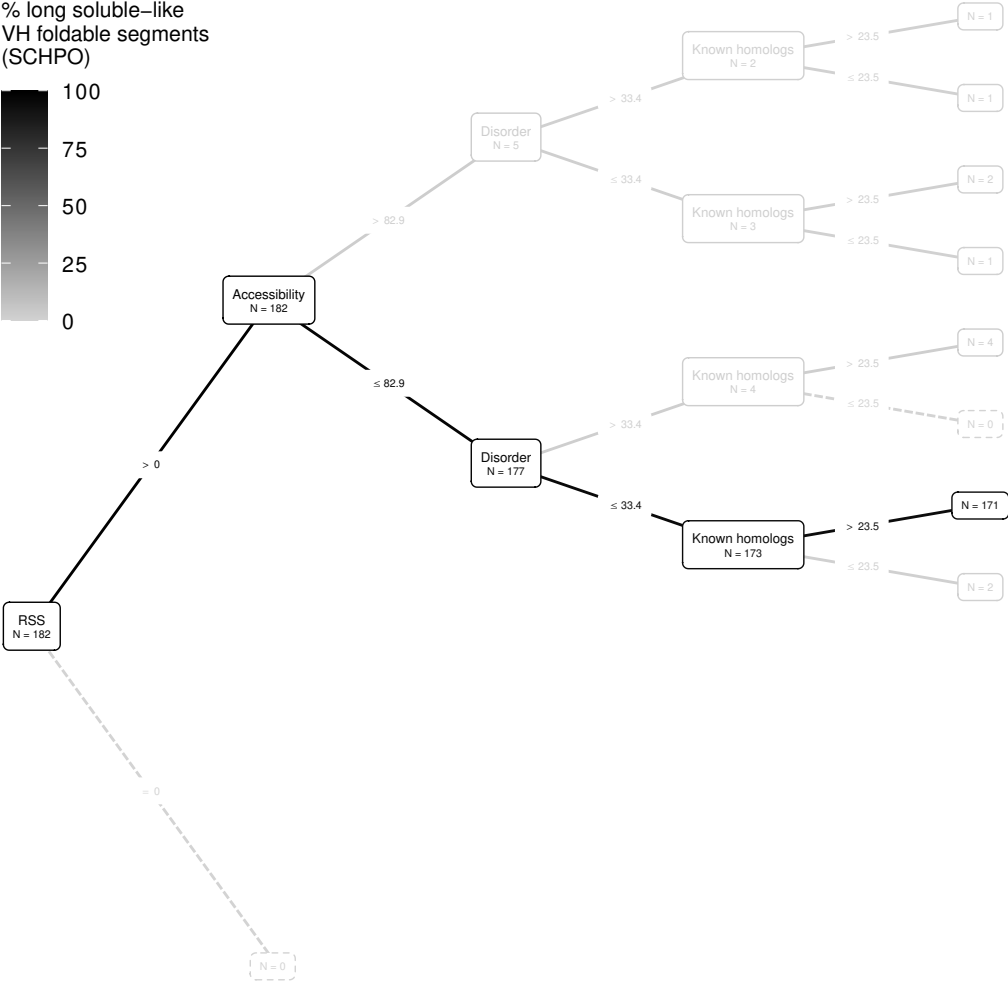

% long soluble-like  
VH foldable segments  
(SOYBN)

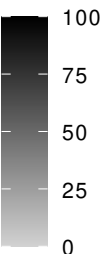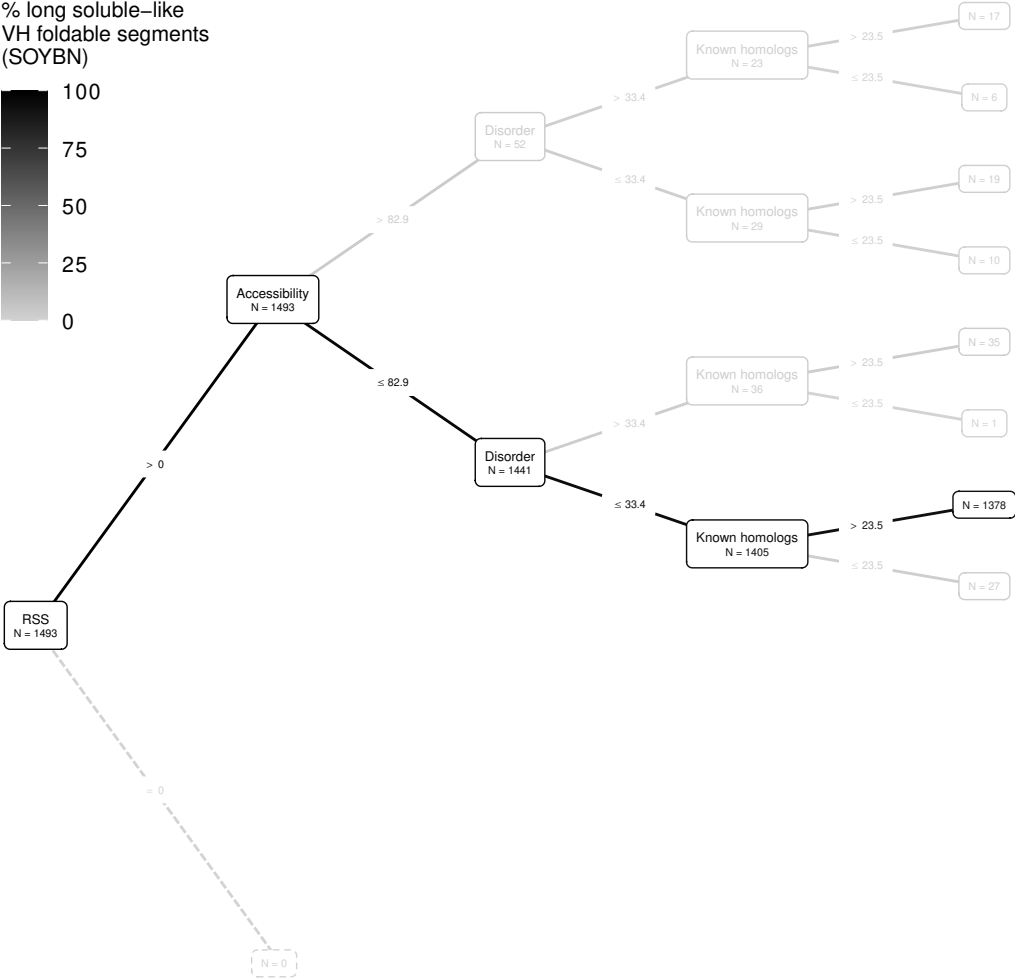

% long soluble-like  
VH foldable segments  
(STAA8)

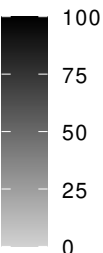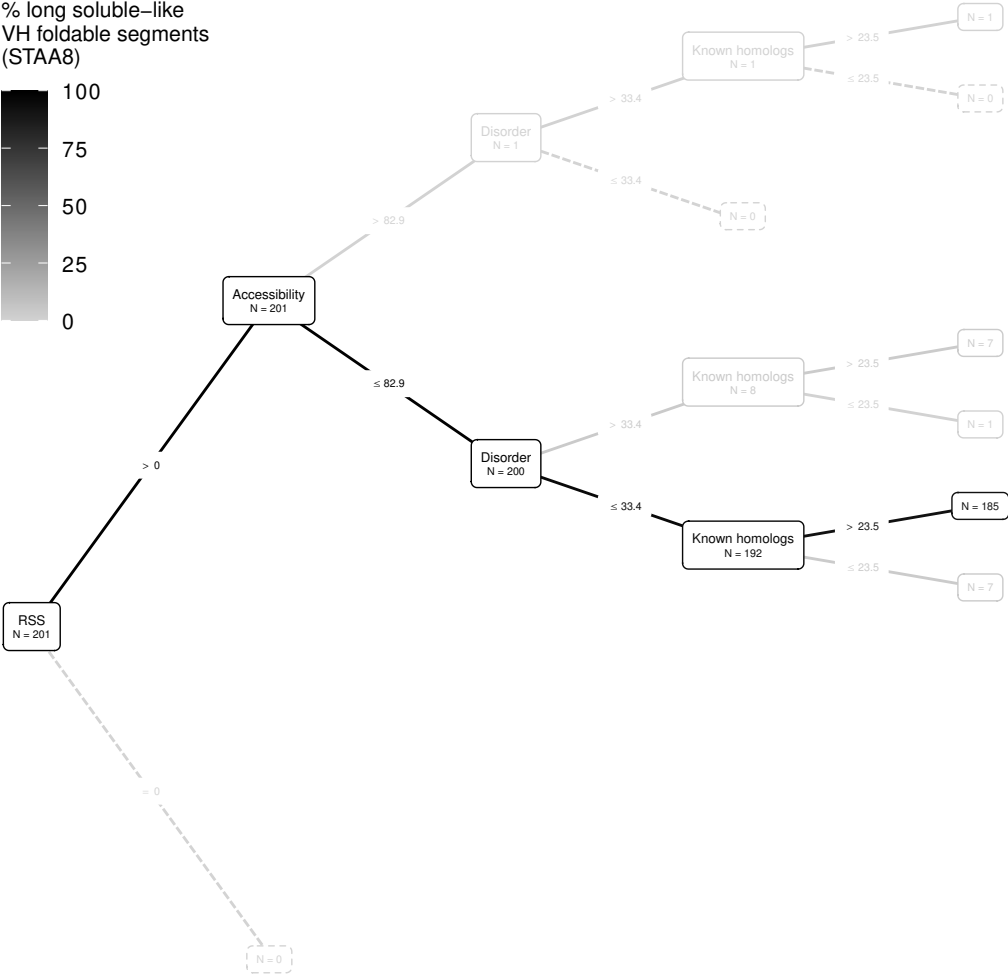

% long soluble-like  
VH foldable segments  
(TRYCC)

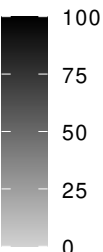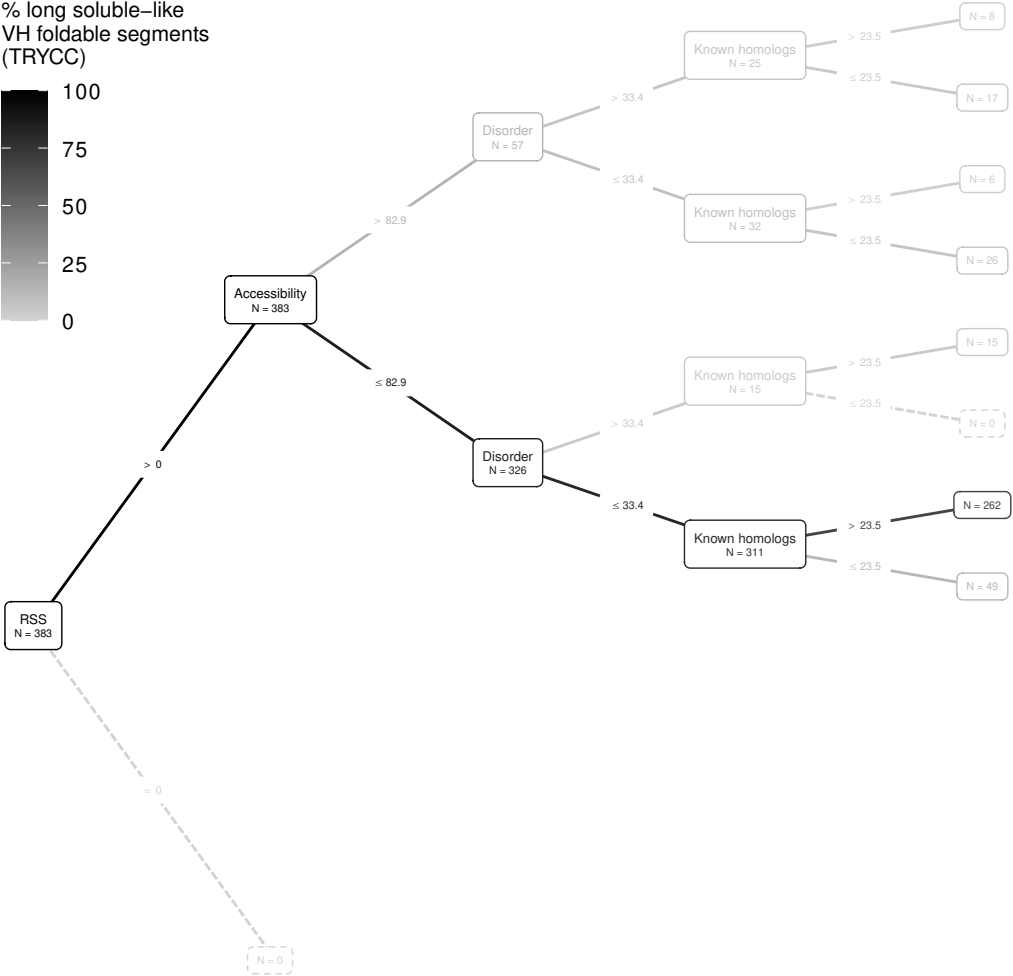

% long soluble-like  
VH foldable segments  
(YEAST)

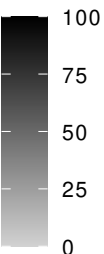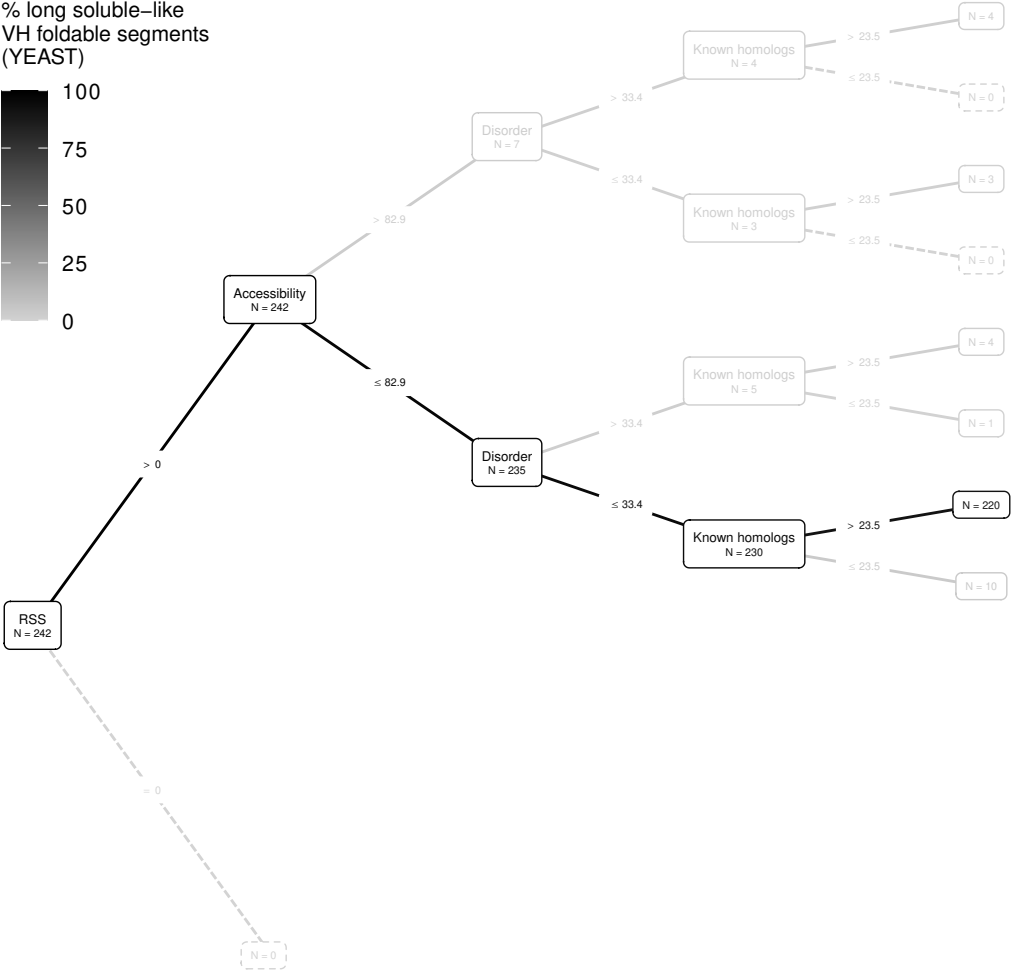

Supplement: s1 [file s1]
