# Supplementary material for: Digging into the 3D Structure Predictions of AlphaFold2 with Low Confidence: Disorder and Beyond
Source: MDPI journal article supplement (doi:10.3390/biom12101467), 2022-10-13
Supplement: s1 [file s1]

**Table S1. Distribution of VH and VL residues within the long soluble-like foldable segments of the AFDB v1 dataset (21 proteomes).** Minimum and maximum values are underlined (percentages, segment mean length). The proteomes are top-down sorted according to their increasing number of long soluble-like foldable segments (N). \*3104 sequences were excluded from our analyses, as sequences longer than 2700 amino acids were not modeled in AFDB v1.

| Species<br>(id in AFDB v1)                   | Proteome id<br>in<br>UniProt | Sequence<br>number* | Residue<br>number<br>(Nr) | Long soluble-like foldable segments |                          |                                     |                                                |                                                    |                                     |                                                |                                                    |
|----------------------------------------------|------------------------------|---------------------|---------------------------|-------------------------------------|--------------------------|-------------------------------------|------------------------------------------------|----------------------------------------------------|-------------------------------------|------------------------------------------------|----------------------------------------------------|
|                                              |                              |                     |                           | N                                   | Residues:<br>number, %Nr | VL<br>residue<br>number<br>(VL tot) | Full-VL<br>segments:<br>number,<br>mean length | Full-VL<br>segments:<br>residue number,<br>%VL tot | VH<br>residue<br>number<br>(VH tot) | Full-VH<br>segments:<br>number,<br>mean length | Full-VH<br>segments:<br>residue number,<br>%VH tot |
| <i>Methanocaldococcus jannaschii</i> (METJA) | <a href="#">UP000000805</a>  | 1 773               | 497 291                   | 1 493                               | 347 897 (70.0%)          | 9 664                               | 1 (35.0 aa)                                    | 35 (0.4%)                                          | 268 766                             | 83 (120.9 aa)                                  | 10 037 (3.7%)                                      |
| <i>Staphylococcus aureus</i> (STAA8)         | <a href="#">UP000008816</a>  | 2 888               | 787 862                   | 2 746                               | 536 461 (68.1%)          | 10 916                              | 14 (49.0 aa)                                   | 686 (6.3%)                                         | 415 301                             | 201 (111.9 aa)                                 | 22 487 (5.4%)                                      |
| <i>Escherichia coli</i> (ECOLI)              | <a href="#">UP000000625</a>  | 4 363               | 1 349 433                 | 5 262                               | 996 863 (73.9%)          | 17 116                              | 8 (65.3 aa)                                    | 522 (3.1%)                                         | 765 865                             | 564 (109.3 aa)                                 | 61 666 (8.1%)                                      |
| <i>Mycobacterium tuberculosis</i> (MYCTU)    | <a href="#">UP000001584</a>  | 3 988               | 1 313 964                 | 5 939                               | 925 656 (70.4%)          | 28 335                              | 29 (53.3 aa)                                   | 1 547 (5.5%)                                       | 683 195                             | 583 (83.0 aa)                                  | 48 404 (7.1%)                                      |
| <i>Schizosaccharomyces pombe</i> (SCHPO)     | <a href="#">UP000002485</a>  | 5 128               | 2 345 773                 | 7 869                               | 1 664 086 (70.9%)        | 165 452                             | 322 (57.6 aa)                                  | 18 560 (11.2%)                                     | 866 109                             | 182 (90.2 aa)                                  | 16 419 (1.9%)                                      |
| <i>Saccharomyces cerevisiae</i> (YEAST)      | <a href="#">UP000002311</a>  | 6 040               | 2 902 659                 | 9 799                               | 1 928 423 (66.4%)        | 189 995                             | 408 (53.7 aa)                                  | 21 905 (11.5%)                                     | 989 289                             | 242 (97.8 aa)                                  | 23 661 (2.4%)                                      |
| <i>Candida albicans</i> (CANAL)              | <a href="#">UP000000559</a>  | 5 974               | 2 918 918                 | 9 850                               | 1 874 606 (64.2%)        | 170 807                             | 422 (54.7 aa)                                  | 23 073 (13.5%)                                     | 1 007 381                           | 268 (95.8 aa)                                  | 25 676 (2.6%)                                      |
| <i>Plasmodium falciparum</i> (PLAF7)         | <a href="#">UP000001450</a>  | 5 187               | 3 343 123                 | 10 107                              | 1 938 785 (58.0%)        | 782 869                             | 2 024 (92.8 aa)                                | 187 803 (24.0%)                                    | 461 940                             | 32 (116.5 aa)                                  | 3 727 (0.8%)                                       |
| <i>Leishmania infantum</i> (LEIIN)           | <a href="#">UP000008153</a>  | 7 924               | 4 678 533                 | 19 010                              | 2 596 542 (55.5%)        | 448 233                             | 1 807 (55.6 aa)                                | 100 425 (22.4%)                                    | 998 736                             | 220 (91.6 aa)                                  | 20 151 (2.0%)                                      |
| <i>Dictyostelium discoideum</i> (DICDI)      | <a href="#">UP000002195</a>  | 12 622              | 6 507 765                 | 20 776                              | 3 971 159 (61.0%)        | 636 863                             | 1 385 (60.9 aa)                                | 84 384 (13.3%)                                     | 1 653 192                           | 204 (87.5 aa)                                  | 17 847 (1.1%)                                      |
| <i>Drosophila melanogaster</i> (DROME)       | <a href="#">UP000000803</a>  | 13 458              | 6 656 778                 | 23 182                              | 4 008 537 (60.2%)        | 512 807                             | 1 555 (53.9 aa)                                | 83 778 (16.3%)                                     | 2 011 396                           | 363 (87.1 aa)                                  | 31 608 (1.6%)                                      |
| <i>Caenorhabditis elegans</i> (CAEEL)        | <a href="#">UP000001940</a>  | 19 694              | 7 812 030                 | 26 172                              | 4 939 911 (63.2%)        | 566 456                             | 939 (55.2 aa)                                  | 51 787 (9.1%)                                      | 2 370 585                           | 381 (87.4 aa)                                  | 33 296 (1.4%)                                      |
| <i>Trypanosoma cruzi</i> (TRYCC)             | <a href="#">UP000002296</a>  | 19 036              | 8 959 621                 | 33 746                              | 5 748 836 (64.2%)        | 899 984                             | 1 687 (60.1 aa)                                | 101 448 (11.3%)                                    | 2 248 528                           | 383 (86.7 aa)                                  | 33 204 (1.5%)                                      |
| <i>Rattus norvegicus</i> (RAT)               | <a href="#">UP000002494</a>  | 21 270              | 10 424 727                | 36 248                              | 6 363 218 (61.0%)        | 764 075                             | 2 098 (56.0 aa)                                | 117 567 (15.4%)                                    | 3 241 197                           | 795 (93.7 aa)                                  | 74 458 (2.3%)                                      |
| <i>Mus musculus</i> (MOUSE)                  | <a href="#">UP000000589</a>  | 21 613              | 10 879 808                | 37 408                              | 6 645 979 (61.1%)        | 793 555                             | 2 191 (56.2 aa)                                | 123 022 (15.5%)                                    | 3 391 084                           | 785 (97.6 aa)                                  | 76 606 (2.3%)                                      |
| <i>Homo sapiens</i> (HUMAN)                  | <a href="#">UP000005640</a>  | 20 294              | 10 532 415                | 37 574                              | 6 504 290 (61.8%)        | 836 065                             | 2 421 (59.5 aa)                                | 143 962 (17.2%)                                    | 3 264 186                           | 784 (93.5 aa)                                  | 73 324 (2.2%)                                      |
| <i>Arabidopsis thaliana</i> (ARATH)          | <a href="#">UP000006548</a>  | 27 434              | 11 037 703                | 40 673                              | 7 715 899 (69.9%)        | 916 293                             | 1 578 (59.1 aa)                                | 93 328 (10.2%)                                     | 4 141 019                           | 822 (92.5 aa)                                  | 76 000 (1.8%)                                      |
| <i>Danio rerio</i> (DANRE)                   | <a href="#">UP000000437</a>  | 24 661              | 12 654 340                | 44 349                              | 8 187 933 (64.7%)        | 939 278                             | 2 538 (55.8 aa)                                | 141 544 (15.1%)                                    | 4 179 325                           | 741 (88.9 aa)                                  | 65 910 (1.6%)                                      |
| <i>Oryza sativa</i> (ORYSJ)                  | <a href="#">UP000059680</a>  | 43 649              | 13 374 028                | 52 282                              | 8 135 335 (60.8%)        | 1 109 607                           | 2 809 (61.4 aa)                                | 172 581 (15.6%)                                    | 4 125 257                           | 1 085 (87.2 aa)                                | 94 606 (2.3%)                                      |
| <i>Zea mays</i> (MAIZE)                      | <a href="#">UP000007305</a>  | 39 299              | 15 340 862                | 59 864                              | 9 901 232 (64.5%)        | 1 471 243                           | 2 911 (60.1 aa)                                | 174 897 (11.9%)                                    | 4 601 754                           | 1 184 (83.9 aa)                                | 99 336 (2.2%)                                      |
| <i>Glycine max</i> (SOYBN)                   | <a href="#">UP000008827</a>  | 55 799              | 21 578 168                | 79 666                              | 14 947 524 (69.3%)       | 2 019 537                           | 3 497 (61.7 aa)                                | 215 600 (10.7%)                                    | 7 567 348                           | 1 493 (91.7 aa)                                | 136 926 (1.8%)                                     |
| Total                                        |                              | 362 094             | 155 895 801               | 564 015                             | 99 879 172<br>(64.1%)    | 13 289 150                          | 30 644<br>(60.7 aa)                            | 1 858 454<br>(14.0%)                               | 49 251 453                          | 11 395<br>(91.7 aa)                            | 1 045 349<br>(2.1%)                                |
