# Supplementary material for: Digging into the 3D Structure Predictions of AlphaFold2 with Low Confidence: Disorder and Beyond
Source: Biomolecules. 2022 Oct 13;12(10):1467. doi: 10.3390/biom12101467 (PMC9599455; doi:10.3390/biom12101467)
Supplement: Supplementary file 1 [file biomolecules-12-01467-s001.zip]

Archive with 4 entries (4 files):
- Figure S2.pdf
- Figure_S1.pdf
- Figure_S3.pdf
- Table S1.pdf
